# Supplementary material for: Validation of lake surface state in the HIRLAM NWP model against in-situ measurements in Finland
Source: Copernicus journal article supplement (doi:10.5194/gmd-2018-270), 2018-11-06
Supplement: Supplementary file [file gmd-2018-270-AC2-supplement.pdf]

## Validation of lake surface state in the HIRLAM v.7.4 NWP model against *in-situ* measurements in Finland

Laura Rontu<sup>1</sup>, Kalle Eerola<sup>1</sup>, and Matti Horttanainen<sup>1</sup>

<sup>1</sup>Finnish Meteorological Institute, P.O. Box 503, 00101 Helsinki, Finland

**Correspondence:** laura.rontu@fmi.fi

**Abstract.** High Resolution Limited Area Model (HIRLAM), used for the operational numerical weather prediction in the Finnish Meteorological Institute (FMI), includes prognostic treatment of lake surface state since 2012. Forecast is based on the Freshwater Lake (FLake) model integrated into HIRLAM. Additionally, an independent objective analysis of lake surface water temperature (LSWT) combines the short forecast of FLake to observations from the Finnish Environment Institute (SYKE). The resulting description of lake surface state - forecast FLake variables and analysed LSWT - was compared to SYKE observations of lake water temperature, freezing and melting dates as well as the ice thickness and snow depth for 2012-2018 over 45 lakes in Finland. During the ice-free period, the predicted LSWT corresponded to the observations with a slight overestimation, with a systematic error of + 0.91 K. The colder temperatures were underrepresented and the maximum temperatures were too high. The objective analysis of LSWT was able to reduce the bias to + 0.35 K. The predicted freezing dates corresponded well the observed dates, mostly within the accuracy of a week. The forecast melting dates were far too early, typically several weeks ahead of the observed dates. The growth of ice thickness after freezing was generally overestimated. However, practically no predicted snow appeared on lake ice. The absence of snow, found to be due to a technical error in HIRLAM, is suggested to be also the reason of the inaccurate simulation of the lake ice melt in spring.

*Copyright statement.* ©Authors 2018. This work is distributed under the Creative Commons Attribution 4.0 License.

### 15 1 Introduction

Lakes influence the energy exchange between the surface and the atmosphere, the dynamics of the atmospheric boundary layer and the near-surface weather. This is important for weather forecasting over the areas where lakes, especially those with a large yearly variation of the water temperature, freezing in autumn and melting in spring, cover a significant area of the surface (Kheyrollah Pour et al., 2017; Laird et al., 2003 and references therein). Description of the lake surface state influences the numerical weather prediction (NWP) results, in particular in the models whose resolution is high enough to account for even the smaller lakes (Eerola et al., 2014 and references therein). Especially, the existence of ice can be important for the numerical forecast (Eerola et al., 2014; Cordeira and Laird, 2008).

1

## Validation of lake surface state in the HIRLAM NWP model against *in-situ* measurements in Finland

Laura Rontu<sup>1</sup>, Kalle Eerola<sup>1</sup>, and Matti Horttanainen<sup>1</sup>

<sup>1</sup>Finnish Meteorological Institute, P.O. Box 503, 00101 Helsinki, Finland

**Correspondence:** laura.rontu@fmi.fi

**Abstract.** High Resolution Limited Area Model (HIRLAM), used for operational numerical weather prediction in the Finnish Meteorological Institute (FMI), includes prognostic treatment of lake surface state since 2012. Forecast is based on the Freshwater Lake (FLake) model integrated to HIRLAM. Additionally, an independent objective analysis of lake surface water temperature (LSWT) combines the short forecast of FLake to observations from the Finnish Environment Institute (SYKE). The resulting description of lake surface state - forecast FLake variables and analysed LSWT - was compared to SYKE observations of lake water temperature, freezing and melting dates as well as the ice and snow thickness for 2012-2018 over 45 lakes in Finland. During the ice-free period, the predicted LSWT corresponded to the observations with a slight overestimation, with a systematic error of + 0.91 K. The colder temperatures were underrepresented and the maximum temperatures were too high. The objective analysis of LSWT was able to reduce the bias to + 0.35 K. The predicted freezing dates corresponded well the observed dates, mostly within the accuracy of a week. The forecast melting dates were far too early, typically several weeks ahead of the observed dates. The growth of ice thickness after freezing was generally overestimated. However, practically no predicted snow appeared on lake ice. The absence of snow, found to be due to a technical error in HIRLAM, is suggested to be also the reason of the inaccurate simulation of the ice melt in spring.

*Copyright statement.* ©Authors 2018. This work is distributed under the Creative Commons Attribution 4.0 License.

### 15 1 Introduction

Lakes influence the energy exchange between the surface and the atmosphere, the dynamics of the atmospheric boundary layer and the near-surface weather. This is important for weather forecasting over the areas where lakes, especially those with a large yearly variation of the water temperature, freezing in autumn and melting in spring, cover a significant area of the surface. Description of the lake surface state influences the numerical weather prediction (NWP) results, in particular in the models whose resolution is high enough to account for even the smaller lakes.

The High Resolution Limited Area Model HIRLAM (Uden et al., 2002; Eerola, 2013) has been applied since 1990 for the numerical short-range weather forecast over the Northern Europe. In the beginning, the monthly climatological water surface temperature for both sea (sea surface temperature SST) and lakes (Lake Surface Water Temperature LSWT) was used.

1

In the Finnish Meteorological Institute (FMI), the High Resolution Limited Area Model HIRLAM (Undén et al., 2002; Eerola, 2013) has been applied since 1990 for the numerical short-range weather forecast. In the beginning, the monthly climatological water surface temperature for both sea (sea surface temperature SST) and lakes (Lake Surface Water Temperature LSWT) was used. Since 2012, HIRLAM includes a prognostic lake temperature parameterization based on the Freshwater Lake Model (FLake, Mironov et al., 2010). An independent objective analysis of observed LSWT (Kheyrollah Pour et al., 2017 and references therein) was implemented in 2011. The fractional ice cover (lake ice concentration in each grid-square of the model) is diagnosed from the analysed LSWT.

FLake was designed to be used as a parametrization scheme for the forecast of the lake surface state in NWP and climate models. It allows to predict the lake surface state in interaction with the atmospheric processes treated by the NWP model. The radiative and turbulent fluxes from the atmospheric model are combined with FLake processes at each time-step of the model integration in the model grid, where the fraction and depth of lakes are prescribed.

FLake has been implemented into the main European NWP and regional climate models, first into COSMO (Mironov et al., 2010) then into ECMWF (Balsamo et al., 2012), Unified Model (Rooney and Bornemann, 2013), SURFEX surface modelling framework (Masson et al., 2016), regional climate models RCA (Samuelsson et al., 2010), HCLIM (Lindstedt et al., 2015) and REMO (Pietikäinen et al., 2018), among others. Description of lake surface state and its influence in the numerical weather and climate prediction has been validated in various ways. Results of case studies, e.g. Eerola et al. (2014) and shorter-period NWP experiments, e.g. Eerola et al. (2010); Rontu et al. (2012); Kheyrollah Pour et al. (2014); Kheyrollah Pour et al. (2017) as well as climate model results, e.g. Samuelsson et al. (2010); Pietikäinen et al. (2018), have been compared with remote-sensing satellite data and *in-situ* lake temperature and ice measurements as well as validated against the standard weather observations. In general, improvement of the scores has been seen over regions where lakes occupy a significant area. However, specific features of each of the host models influence the results of the coupled atmosphere-lake system as FLake appears to be quite sensitive to the forcing by the atmospheric model.

The aim of the present study is to use *in-situ* LSWT measurements, lake ice freezing and melting dates and measurements of ice and snow thickness by the Finnish Environment Institute (Suomen Ympäristökeskus = SYKE) for validation of the lake surface state forecast by the operational HIRLAM NWP model. For this purpose, HIRLAM analyses and forecasts archived by the Finnish Meteorological Institute (FMI) were compared with the observations by SYKE over the lakes of Finland from spring 2012 to summer 2018. To our knowledge, this is the longest available detailed dataset that allows to evaluate how well the lake surface state is simulated by an operational NWP model that applies FLake parametrizations.

## 2 Lake surface state in HIRLAM

FLake was implemented in the HIRLAM forecasting system in 2012 (Kourzeneva et al., 2008; Eerola et al., 2010). The model utilizes external datasets on the lake depth (Kourzeneva et al., 2012a; Choulga et al., 2014) and the lake climatology (Kourzeneva et al., 2012b). The latter is only needed in order to provide initial values of FLake prognostic variables in the very first forecast (so-called cold start). Real-time *in-situ* LSWT observations by SYKE for 27 Finnish lakes were obtained in 2011

Since 2012, HIRLAM includes a prognostic lake temperature parameterization based on the Freshwater Lake Model (FLake, Mironov et al., 2010). An independent objective analysis of observed LSWT (Kheyrollah Pour et al. (2017) and references therein) was implemented in 2011. Fractional ice cover (lake ice concentration in each grid-square of the model) is estimated separately based on the analysed LSWT and the ice thickness predicted by FLake.

FLake was designed to be used as a parametrization scheme for the forecast of the lake surface state in NWP and climate models. It allows to predict the lake surface state in interaction with the atmospheric processes treated by the NWP model. The radiative and turbulent fluxes from the atmospheric model are combined with FLake processes at each time-step of the model integration (with a typical interval of one or several minutes) in the model grid, where the fraction and depth of lakes are prescribed.

FLake has been implemented into the main European NWP and regional climate models, first into COSMO (Mironov et al., 2010) then into ECMWF (Balsamo et al., 2012), Unified Model (Rooney and Bornemann, 2013), SURFEX surface modelling framework (Masson et al., 2016), regional climate models RCA (Samuelsson et al., 2010), HCLIM (Lindstedt et al., 2015) and REMO (Pietikäinen et al., 2018), among others. Description of lake surface state and its influence in the numerical weather and climate prediction has been validated in various ways. Results of case studies, e.g. Eerola et al. (2014) and shorter-period NWP experiments, e.g. Eerola et al. (2010); Rontu et al. (2012); Kheyrollah Pour et al. (2014); Kheyrollah Pour et al. (2017) as well as climate model results, e.g. Samuelsson et al. (2010); Pietikäinen et al. (2018), have been compared with remote-sensing satellite data and *in-situ* lake temperature and ice measurements as well as validated against the standard weather observations. In general, improvement of the scores has been seen over regions where lakes occupy a significant area. However, specific features of each of the host models influence the results of the coupled atmosphere-lake system as FLake appears to be quite sensitive to the forcing by the atmospheric model.

The aim of the present study is to use *in-situ* LSWT measurements, lake freezing and melting dates and measurements of ice and snow thickness by the Finnish Environment Institute (Suomen Ympäristökeskus = SYKE) for validation of the lake surface state forecast by the operational HIRLAM NWP model. For this purpose, HIRLAM analyses and forecasts archived by the Finnish Meteorological Institute (FMI) were compared with the observations by SYKE over the lakes of Finland from spring 2012 to summer 2018. To our knowledge, this is the longest available detailed dataset that allows to evaluate how well the lake surface state is simulated by an operational NWP model that applies FLake parametrizations.

## 2 Lake surface state in HIRLAM

FLake was implemented in the HIRLAM forecasting system in 2012 (Kourzeneva et al., 2008; Eerola et al., 2010). The model utilizes external datasets on the lake depth (Kourzeneva et al., 2012a; Choulga et al., 2014) and the lake climatology (Kourzeneva et al., 2012b). The latter is only needed in order to provide initial values of FLake prognostic variables in the very first forecast. Real-time *in-situ* LSWT observations by SYKE for 27 Finnish lakes became available for the operational HIRLAM analysis in 2011 (Eerola et al., 2010; Rontu et al., 2012). In the current operational HIRLAM at FMI FLake provides the background for the optimal interpolation (OI, based on Gandin 1965) analysis of LSWT. However, the prognostic FLake



to be used for the operational LSWT analysis in HIRLAM (Eerola et al., 2010; Rontu et al., 2012). In the current operational HIRLAM at FMI FLake provides the background for the optimal interpolation analysis (OI, based on Gandin, 1965) of LSWT. However, the prognostic FLake variables are not corrected using the analysed LSWT. This would require more advanced data assimilation methods based on e.g. the extended Kalman filter (Kourzeneva, 2014).

## 5 2.1 Freshwater lake model in HIRLAM

FLake is a bulk model capable of predicting the vertical temperature structure and mixing conditions in lakes of various depths on time-scales from hours to years (Mironov et al., 2010). The model is based on two-layer parametric representation of the evolving temperature profile in the water and on the integral budgets of energy for the layers in question. Bottom sediments and the thermodynamics of the ice and snow on ice layers are treated separately. FLake depends on prescribed lake depth information. The prognostic and diagnostic variables of HIRLAM FLake together with the analysed lake surface variables in HIRLAM are listed in the Appendix (Table A1).

At each time step of the HIRLAM forecast, FLake is driven by the atmospheric radiative and turbulent fluxes provided by the physical parameterisations in HIRLAM. This couples the atmospheric variables over lakes with the lake surface properties as provided by FLake. Most importantly, FLake provides HIRLAM with the evolving lake surface (water, ice, snow) temperature, that influences the HIRLAM forecast of the grid-average near-surface temperatures.

Implementation of FLake model as a parametrization scheme in HIRLAM was based on the experiments described by Rontu et al., 2012. Compared to the reference version of FLake (Mironov et al., 2010), minor modifications were introduced, namely, use of constant snow density =  $300 \text{ kg m}^{-3}$ , molecular heat conductivity =  $1 \text{ J m}^{-1} \text{ s}^{-1} \text{ K}^{-1}$ , constant albedos of dry snow = 0.75 and ice = 0.5. Bottom sediment calculations were excluded. Global lake depth database (GLDB v.2, Choulga et al., 2014) was used for derivation of mean lake depth in each gridsquare. Fraction of lake was taken from HIRLAM physiography database, where it originates from GLCC (Loveland et al., 2000).

Lake surface temperature is diagnosed from the mixed layer temperature for the unfrozen lake gridpoints and from the ice or snow-on-ice temperature for the frozen points. In FLake, ice starts to grow from an assumed value of one millimeter when temperature reaches the freezing point. The whole lake tile in a gridsquare is considered by FLake either frozen or unfrozen. Snow on ice is accumulated from the model's snowfall at each time step during the numerical integration.

## 2.2 Objective analysis of LSWT observations

A comprehensive description of the optimal interpolation (OI) of the LSWT observations in HIRLAM is given by (Kheyrollah Pour et al., 2017). Shortly, LSWT analysis is obtained by correcting the FLake forecast at each gridpoint by using the weighted average of the deviations of observations from their background values. Prescribed statistical information about the observation and background error variance as well as the distance-dependent autocorrelation between the locations (observations and gridpoints) are applied. The real-time observations entering the HIRLAM surface analysis system are subject to quality control in two phases. First, the observations are compared to the background, provided by the FLake short forecast. Second, optimal

variables are not corrected using the analysed LSWT, which would require advanced data assimilation methods based on e.g. the extended Kalman filter (Kourzeneva, 2014). The relations between the OI analysis and the prognostic FLake in HIRLAM are schematically illustrated in Figure 1.

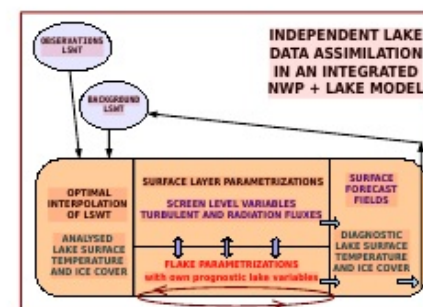

Figure 1. Coexistence of the independent objective analysis of the observed LSWT and prognostic FLake parametrizations in HIRLAM.

## 2.1 Freshwater lake model in HIRLAM

5 FLake is a bulk model capable of predicting the vertical temperature structure and mixing conditions in lakes of various depths on time-scales from hours to years (Mironov et al., 2010). The model is based on two-layer parametric representation of the evolving temperature profile in the water and on the integral budgets of energy for the layers in question. Bottom sediments and the thermodynamics of the ice and snow on ice layers are treated separately. FLake depends on prescribed lake depth information. The prognostic and diagnostic variables of HIRLAM/FLake plus the analysed lake surface variables in HIRLAM are listed in the Appendix (Table A1).

At each time step of the HIRLAM forecast, FLake is driven by the atmospheric radiative and turbulent fluxes provided by the physical parameterisations in HIRLAM. This couples the atmospheric variables over lakes with the lake surface properties as provided by FLake. Implementation of FLake model as a parametrizations scheme in HIRLAM was based on the experiments described by Rontu et al. (2012). Compared to the reference version of FLake (Mironov et al., 2010), minor modifications were introduced, namely, use of constant snow density =  $300 \text{ kg m}^{-3}$ , molecular heat conductivity =  $1 \text{ J m}^{-1} \text{ s}^{-1} \text{ K}^{-1}$ , constant albedos of dry snow = 0.75 and ice = 0.5. Bottom sediment calculations were excluded. Global lake depth database (GLDB v.2, Choulga et al. (2014)) is used for derivation of mean lake depth in each gridsquare. Fraction of lake is taken from HIRLAM physiography database, where it originates from GLCC (Loveland et al., 2000).

In this study, lake surface temperature and thickness of ice predicted by FLake were used for the model-observation comparison. Lake surface temperature is diagnosed from the mixed layer temperature for the unfrozen lake gridpoints and from the ice

interpolation is done at each observation location, using the neighbouring observations only (excluding the current observation) and comparing the result to the observed value at the station.

A specific feature of the lake surface temperature OI is that the interpolation is performed not only within the (large) lakes but also across the lakes: within a statistically pre-defined radius, the observations affect all gridpoints containing a fraction of lake. This ensures that the analysed LSWT on lakes without own observations may also be influenced by observations from neighbouring lakes, not only by the first guess provided by FLake forecast.

The relations between the OI analysis and the prognostic FLake in HIRLAM are schematically illustrated in Figure 1. Within the present HIRLAM setup, the background for the analysis is provided by the short (6-hour) FLake forecast but the next forecast is not initialized from the analysis. Instead, FLake continues running from the previous forecast, driven by the atmospheric state given by HIRLAM at each time step. This means that FLake does not benefit from the result of OI analysis but the analysis remains as an extra diagnostic field, to some extent independent of the LSWT forecast. However, FLake background has a large influence in the analysis, especially over distant lakes where neighbouring observations are not available. The diagnostic LSWT analysis, available at every gridpoint of HIRLAM, might be useful e.g. for hydrological, agricultural or road weather applications.

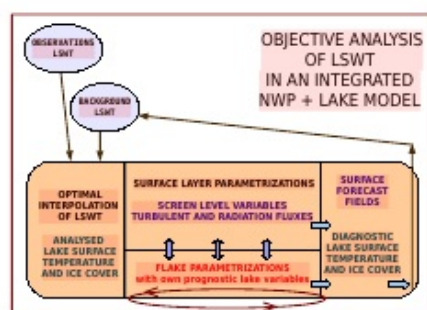

**Figure 1.** Coexistence of the independent objective analysis of the observed LSWT and prognostic FLake parametrizations in HIRLAM. The thin arrows are related to data flow between HIRLAM analysis-forecast cycles while the thick arrows describe processes within each cycle.

Missing LSWT observations in spring and early winter are interpreted to represent presence of ice and given a flag value of  $-1.2^{\circ}\text{C}$ . If, however, the results of the statistical LSWT model (Elo, 2007), provided by SYKE along with the real-time observations, indicate unfrozen conditions, the observations are considered missing. This prevents appearance of ice in summer when observations are missing but leads to a misinterpretation of data in spring if the SYKE model indicates too early melting. In the analysis, fraction of ice is diagnosed from the LSWT field in a simple way. The lake surface within a gridsquare

or snow-on-ice temperature for the frozen points. In FLake, ice starts to grow from an assumed value of one millimeter when temperature reaches the freezing point. The whole lake tile in a gridsquare is considered by FLake either frozen or unfrozen. Snow on ice is accumulated from the model's snowfall at each time step during the numerical integration.

## 2.2 Objective analysis of LSWT observations

A comprehensive description of the optimal interpolation (OI) of the LSWT observations in HIRLAM is given by Kheyrollah Pour et al. (2017). Shortly, LSWT analysis is obtained by correcting the FLake forecast at each gridpoint by using the weighted average of the deviations of observations from their background values. Prescribed statistical information about the observation and background error variance as well as the distance-dependent autocorrelation between the locations (observations and gridpoints) are applied. A specific feature of the lake surface temperature OI is that the interpolation is performed not only within the (large) lakes but also across the lakes: within a statistically pre-defined radius, the observations affect all gridpoints containing a fraction of lake. This ensures that the analysed LSWT on lakes without own observations may also be influenced by observations from neighbouring lakes, not only by the first guess provided by FLake forecast.

Within the present HIRLAM setup, the background for the analysis is provided by the short (6-hour) FLake forecast. However, the next forecast is not initialised from the analysis, see Figure 1. Instead, FLake continues running from the previous forecast, driven by the atmospheric state given by HIRLAM at each time step. This means that the result of OI analysis does not benefit FLake but the analysis remains as some extent as an extra diagnostic field independent of the LSWT forecast. Note that FLake background has a large influence in the analysis, especially over distant lakes where neighbouring observations are not available.

Missing LSWT observations in spring and early winter are interpreted to represent presence of ice and given a flag value of  $-1.2^{\circ}\text{C}$ . If, however, the results of the statistical moving-average-type LSWT model (Elo, 2007), provided by SYKE along with the real-time observations, indicate unfrozen conditions, the observations are considered missing. This prevents appearance of ice in summer when observations are missing but leads to a misinterpretation of data in spring if the SYKE model indicates too early melting. In the analysis, fraction of ice is diagnosed from the LSWT field in a simple way. The lake surface within a gridsquare is assumed fully ice-covered when LSWT falls below  $-0.5^{\circ}\text{C}$  and fully ice-free when LSWT is above  $0^{\circ}\text{C}$ . Between these temperature thresholds, the fraction of ice changes linearly (Kheyrollah Pour et al., 2014).

The HIRLAM surface data assimilation system produces comprehensive feedback information from every analysis-forecast cycle. The feedback consists of the observed value and its deviations from the background and from the final analysis at the observation point. Bilinear interpolation of the analysed and forecast values is done to the observation location from the nearest gridpoints that contain a fraction of lake. In addition, information about the quality check and usage of observations is provided. Fractions of land and lake in the model grid as well as the weights, which were used to interpolate gridpoint values to the observation location, are given. We use this information as basic material of the present study (see sections 3.4 and 4).



is assumed fully ice-covered when LSWT falls below  $-0.5^{\circ}\text{C}$  and fully ice-free when LSWT is above  $0^{\circ}\text{C}$ . Between these temperature thresholds, the fraction of ice changes linearly (Kheyrollah Pour et al., 2014).

The HIRLAM surface data assimilation system produces comprehensive feedback information from every analysis-forecast cycle. The feedback consists of the observed value and its deviations from the background and from the final analysis at the observation point. Bilinear interpolation of the analysed and forecast values is done to the observation location from the nearest gridpoints that contain a fraction of lake. In addition, information about the quality check and usage of observations is provided. Fractions of land and lake in the model grid as well as the weights, which were used to interpolate gridpoint values to the observation location, are given. This information is the basis of the present study (see sections 3.3 and 4).

### 3 Model-observation intercomparison 2012-2018

10 In this intercomparison we validated HIRLAM/FLake results against observations about the lake surface state. The impact of FLake parametrizations to the weather forecast by HIRLAM was not considered. This is because no non-FLake weather forecasts exist for comparison with the operational forecasts during the validation period.

15 Throughout the following text, the analysed LSWT refers to the result of OI analysis, where FLake forecast has been used as background (Section 2.2) while the forecast LSWT refers to the value diagnosed from the mixed layer water temperature predicted by FLake (Section 2.1). Observed LSWT refers to the measured by SYKE lake water temperature (Section 3.2).

#### 3.1 FMI operational HIRLAM

20 FMI operational HIRLAM is based on the last reference version (v.7.4), implemented in spring 2012. (Eerola, 2013 and references therein). FLake was introduced into this version. After that the development of HIRLAM was frozen. Thus, during the years of the present comparison, the FMI operational HIRLAM system remains unmodified, which offers a clean time series of data for the model-observation intercomparison. The general properties of the system are summarised in Table 1. In the present study, a coding error in FLake implementation was revealed in the reference HIRLAM v.7.4. A too large critical value to diagnose snow existence prevented practically all accumulation of the forecast snowfall on lake ice in the FMI HIRLAM-FLake operational system.

#### 3.2 SYKE lake observations

25 In this study we used three different types of SYKE lake observations: LSWT, lake ice dates (LID) and ice thickness and snow depth on lake ice. In total, observations on 45 lakes listed in Appendix (Table A2) were included as detailed in the following. The lake depths and surface areas given in Table A2 are based on the updated lake list of GLDB v.3 (Margarita Choulga, personal communication).

Table 1. FMI operational HIRLAM

|                                        |                                                                                                      |
|----------------------------------------|------------------------------------------------------------------------------------------------------|
| Domain                                 | From Atlantic to Ural, from North Africa beyond North Pole                                           |
| Model horizontal / vertical resolution | 7 km / 65 levels                                                                                     |
| HIRLAM version                         | 7.4                                                                                                  |
| Model dynamics                         | Hydrostatic, semi-Lagrangian, grid-point                                                             |
| Atmospheric physical parametrizations  | Savijärvi radiation, CBR turbulence, Rasch-Kristiansson cloud microphysics + Kain-Fritsch convection |
| Surface physical parametrizations      | ISBA-newsnow for surface, FLake for lakes                                                            |
| Data assimilation                      | Default atmospheric (4DVAR) and surface (OI) analysis                                                |
| Lateral boundaries                     | ECMWF forecast                                                                                       |
| Forecast                               | Up to +54 h initiated every 6h (00, 06, 12, 18 UTC)                                                  |

### 3 Model-observation intercomparison 2012-2018

5 In this intercomparison we validated HIRLAM/FLake results against observations about the lake surface state. The impact of FLake parametrizations to the weather forecast by HIRLAM is not considered. This is because the archived observations and the operational HIRLAM results were used during the period from spring 2012 to summer 2018 when FLake was always an integral part of HIRLAM. This means that there are no non-FLake weather forecasts to compare with.

#### 3.1 FMI operational HIRLAM

10 FMI operational HIRLAM is based on the last reference version (v.7.4), implemented in spring 2012. (Eerola (2013) and references therein). FLake was introduced into this version. After that the development of HIRLAM was frozen. Thus, during the years of the present comparison, the FMI operational HIRLAM system remains unmodified, which offers a clean time series of data for the model-observation intercomparison. The general properties of the system are summarised in Table 1. In the present study, a coding error in FLake implementation was revealed in the reference HIRLAM v.7.4. A too large critical value to diagnose snow existence prevented practically all accumulation of the forecast snowfall on lake ice in the FMI HIRLAM-FLake operational system.

#### 3.2 SYKE lake observations

##### 3.2.1 Lake temperature measurements

15 Regular *in-situ* lake water temperature (LWT) measurements are performed by SYKE. SYKE operates 32 regular lake and river water temperature measurement sites in Finland. The temperature of the lake water is measured every morning at 8.00 AM local time, close to shore, at 20 cm below the water surface. The measurements are recorded either automatically or manually and are performed only during the ice-free season (Korhonen, 2002; Rontu et al., 2012). Measurements from 27 lakes (Figure 2,

**Table 1.** FMI operational HIRLAM

|                                        |                                                                                                         |
|----------------------------------------|---------------------------------------------------------------------------------------------------------|
| Domain                                 | From Atlantic to Ural, from North Africa beyond North Pole                                              |
| Model horizontal / vertical resolution | 7 km / 65 levels                                                                                        |
| HIRLAM version                         | 7.4                                                                                                     |
| Model dynamics                         | Hydrostatic, semi-Lagrangian, grid-point                                                                |
| Atmospheric physical parametrizations  | Savijärvi radiation, CBR turbulence,<br>Rasch-Kristiansson cloud microphysics + Kain-Fritsch convection |
| Surface physical parametrizations      | ISBA-newsnow for surface, FLake for lakes                                                               |
| Data assimilation                      | Default atmospheric (4DVAR) and surface (OI) analysis                                                   |
| Lateral boundaries                     | ECMWF forecast                                                                                          |
| Forecast                               | Up to +54 h initiated every 6h (00, 06, 12, 18 UTC)                                                     |

### 3.2.1 Lake temperature measurements

Regular *in-situ* lake water temperature measurements are performed by SYKE. Currently SYKE operates 34 regular lake and river water temperature measurement sites in Finland. The temperature of the lake water is measured every morning at 8.00 AM local time, close to shore, at 20 cm below the water surface. The measurements are recorded either automatically or manually and are performed only during the ice-free season (Korhonen, 2002; Rontu et al., 2012). Further, we will for simplicity denote also these data as LSWT observations although they do not represent exactly the same surface water temperature (skin temperature, radiative temperature) that could be estimated by satellite measurements. These data are available in the SYKE open data archive (SYKE, 2018). Measurements from 27 of these 34 lakes (Figure 2, white dots) were selected for use in the FMI operational HIRLAM in 2011, and the list has been kept unmodified since that. The set of 27 daily observations, quality-controlled by HIRLAM, were obtained from the analysis feedback files and used in all comparisons reported in this study.

### 3.2.2 Freezing and melting dates

Regular visual observations of freezing and melting of lakes have been recorded in Finland for centuries, the longest time series starting in the middle of the 19th century (Korhonen, 2005). Presently, dates of freezing and melting are available from SYKE (2018) on 123 lakes, but the time series for many lakes are discontinuous. Further, we will denote the melting and freezing dates together by “lake ice dates” (LID). For both freezing and melting the dates are available in two categories: for freezing “freezing of the visible area” (code 29 by SYKE) and “permanent freezing of the visible area” (code 30). For melting the dates are defined as “no ice visible from the observation site” (code 28) and “no ice on the outer open water areas” (code 27). LID observations aim at representing conditions on entire lakes. LID observations by SYKE are made independently of their LSWT measurements and possibly from different locations on the same lakes. The LSWT measurements may be started later than the date of reported lake ice melting or end earlier than the reported freezing date.

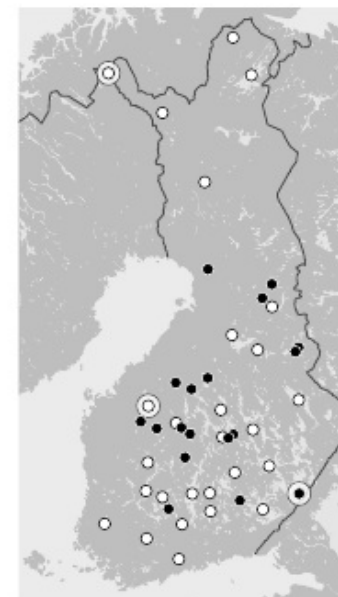

**Figure 2.** Map of SYKE observation points used in this study: lakes with both LSWT and LID observations (white), lakes where only LID is available (black). On Lakes Lappajärvi, Kilpisjärvi and Simpelejärvi also ice and snow thickness measurements were used (Section 4.3), they are surrounded with a large white circle. List of the lakes with coordinates is given in Appendix A2.

white dots) used by the FMI operational HIRLAM, were included in all comparisons reported in this study. These data are also available in the SYKE open data archive (SYKE, 2018).

### 3.2.2 Freezing and melting dates

Regular visual observations of freezing and melting of lakes have been recorded in Finland for centuries, the longest time series starting in the middle of the 19th century (Korhonen, 2005). Presently, dates of freezing and melting are available from SYKE (2018) on 123 lakes, but the time series for many lakes are discontinuous. Further, we will denote the melting and freezing dates together by “lake ice dates” (LID). For both freezing and melting the dates are available in two categories: for freezing “freezing of the visible area” (code 29 by SYKE) and “permanent freezing of the visible area” (code 30). For melting the dates are defined as “no ice visible from the observation site” (code 28) and “no ice on the outer open water areas” (code 27).



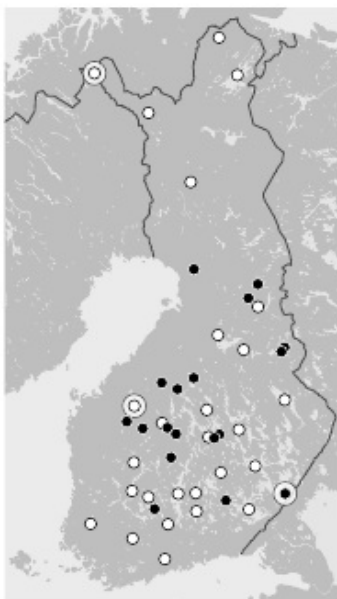

**Figure 2.** Map of SYKE observation points used in this study: lakes with both lake surface water temperature (LSWT) and lake ice date (LID) observations (white), lakes where only LID is available (black). On Lakes Lappajärvi, Kilpisjärvi and Simpelejärvi also ice thickness and snow depth measurements were used (Section 4.3), they are surrounded with a large white circle. List of the lakes with coordinates is given in Appendix A2.

LID from the 27 lakes whose LSWT measurements are used in HIRLAM were available and selected for this study. In addition, 18 lakes with only LID available (Figure 2, black dots) were chosen for comparison with HIRLAM/FLake LID.

### 3.2.3 Ice thickness and snow depth on lakes

SYKE records the lake ice thickness and snow depth on around 50 locations in Finland. Archived data are available in total from 160 measurement sites. The manual measurements are done three times a month during the ice season. Thickness of ice and snow depth on ice are measured by drilling holes through snow and ice layers along chosen tracks, normally at least 50 m from the coast (Korhonen, 2005). The locations may differ from those of the LSWT measurement or LID observation over the same lakes.

LID from the 27 lakes whose LSWT measurements are used in HIRLAM were available and selected for this study. In addition, 18 lakes with only LID available (Figure 2, black dots) were chosen for comparison with HIRLAM/FLake LID.

### 3.2.3 Ice and snow thickness on lakes

SYKE records the lake ice and snow thickness on around 50 locations in Finland, archived data are available in total from 160 measurement sites. The manual measurements are done three times a month during the ice season. Thickness of ice and the snow on ice are measured by drilling holes through snow and ice layers along chosen tracks, normally at least 50 m from the coast (Korhonen, 2005). The locations may differ from those of the LSWT measurement or LID observation over the same lakes. In this study, measurements from lakes Lappajärvi, Kilpisjärvi and Simpelejärvi were utilised as additional data for validation in Section 4.3. These lakes, sufficiently large in order to fit well the HIRLAM grid, represent the western, northern and south-eastern Finland.

## 3.3 Lake surface state derived from HIRLAM output

### 3.3.1 Lake surface water temperature

Diagnosed LSWT from HIRLAM/FLake analysis and forecast cycles was compared with the observed LWT by SYKE using data from the analysis feedback files (Section 2.2) at the observation locations on 06 UTC every day.

### 3.3.2 Freezing and melting dates

Both the analysed LSWT and the lake ice thickness forecast by FLake were separately used to define LID. The values were picked afterwards from the HIRLAM archive for a single gridpoint nearest to each of the 45 observation locations (not interpolated as in the analysis feedback file that was used for the LSWT comparison). For the definition of LID, it was assumed that the gridpoint value nearest to the location of the LSWT observation represents the ice conditions over the chosen lake. In autumn a lake can freeze and melt several times before final freezing. The last date when the forecast ice thickness crossed a critical value of 1 mm or the analysed LSWT fell below freezing point was selected as the date of freezing. To decrease the effect of oscillation of the gridpoint values between the HIRLAM forecast-analysis cycles, the mean of the four daily ice thickness forecasts or analysed LSWT values was used. In the same way, the last date when the forecast ice thickness fell below the critical value of 1 mm or the analysed LSWT value crossed the freezing point was selected as melting day.

### 3.4 Validation methods

For LSWT statistics we used data collected during the HIRLAM surface analysis at each active observation location (Section 2.2), excluding the winter periods 1 December - 31 March. The observations (ob) at 27 SYKE stations were assumed to represent the true value, while the analysis (an) is the result of OI that combines the background forecast (fc) with the observations. Time-series, maps and statistical scores, to be presented in Section 4.1, were derived from these.

### 3.3 Validation of HIRLAM/FLake lake surface state

#### 3.3.1 Lake surface water temperature

LSWT by HIRLAM/FLake, resulting from the objective analysis or diagnosed from the forecast, was compared with the observed LSWT by SYKE using data extracted from the analysis feedback files (Section 2.2) at the observation locations on 06 UTC every day, excluding the winter periods 1 December - 31 March. The observations (ob) at 27 SYKE stations were assumed to represent the true value, while the analysis (an) is the result of OI that combines the background forecast (fc) with the observations. Time-series, maps and statistical scores, to be presented in Section 4.1, were derived from these.

#### 3.3.2 Lake ice conditions

For this study, the observed LID, ice and snow thickness observations were obtained from SYKE open data base, relying on their quality control. The HIRLAM/FLake analysed LSWT as well as the predicted ice thickness and snow depth were picked afterwards from the HIRLAM archive for a single gridpoint nearest to each of the 45 observation locations (not interpolated as in the analysis feedback file that was used for the LSWT comparison). It was assumed that the gridpoint value nearest to the location of the LSWT observation represents the ice conditions over the chosen lake.

LID were defined in two independent ways: from the analysed LSWT and from the forecast lake ice thickness. Note that the ice thickness and snow depth on ice are not analysed variables in HIRLAM. In autumn a lake can freeze and melt several times before final freezing. The last date when the forecast ice thickness crossed a critical value of 1 mm or the analysed LSWT fell below freezing point was selected as the date of freezing. In the same way, the last date when the forecast ice thickness fell below the critical value of 1 mm or the analysed LSWT value crossed the freezing point was selected as melting day. To decrease the effect of oscillation of the gridpoint values between the HIRLAM forecast-analysis cycles, the mean of the four daily ice thickness forecasts or analysed LSWT values was used.

LID by HIRLAM/FLake were compared to the observed dates during 2012-2018. In this comparison we included data also during the winter period. The category 29 observations ("freezing of the visible area", see Section 3.2.2) were used. In this category the time series were the most complete at the selected stations. For the same reason, the melting observations of category 28 ("no ice visible from the observation site") were used for comparison. Furthermore, using a single gridpoint value for the calculation of LID also seems to correspond best the observation definition based on what is visible from the observation site. The statistics were calculated as  $fc - ob$  and  $an - ob$ . Hence, positive values mean that melting or freezing takes place too late in the model as compared to the observations.

In this study, lake ice thickness and snow depth measurements from lakes Lappajärvi, Kilpisjärvi and Simpelejärvi were utilised as additional data for validation of predicted by HIRLAM/FLake ice thickness and snow depth (Section 4.3). These lakes, representing the western, northern and south-eastern Finland, were selected for illustration based on the best data availability during the study years. They are also sufficiently large in order to fit well the HIRLAM grid.

LID by HIRLAM/FLake were compared to the observed dates during 2012-2018, including in the comparison data over all months. The category 29 observations (see Section 3.2.2) were used. In this category the time series were the most complete at the selected stations. For the same reason, the melting observations of category 28 were used for comparison. Furthermore, using a single gridpoint value for the calculation of LID also seems to correspond best the observation definition based on what is visible from the observation site. The statistics were calculated as  $ob - fc$  and  $ob - an$ . Hence, positive values mean that melting or freezing takes place too late in the model as compared to the observations.

## 4 Results

### 4.1 Analysed and forecast LSWT at observation points

Figure 3 shows the frequency distribution of LSWT according to FLake forecast and SYKE observations. It is evident that the amount of data in the class of temperatures which represents frozen conditions (LSWT flag value 272 K) is underestimated by the forecast (Figure 3a). When subzero temperatures are excluded from the comparison (Figure 3b), underestimation in the colder temperature classes and overestimation in the warmer classes still remains. LSWT analysis (Figure 4) improves the situation somewhat but the basic features remain. This is due to the dominance of FLake forecast via the background of the analysis. In Section 4.3, we will show time-series illustrating the physics behind these LSWT statistics.

Table 2 confirms the warm bias by FLake in the unfrozen conditions. Similar results were obtained for all stations together and also for our example lakes Lappajärvi and Kilpisjärvi, to be discussed in detail in Section 4.3. There were three lakes with negative LSWT bias according to FLake forecast, namely the large lakes Saimaa and Päijänne, the smaller Ala-Rieveli. After the correction by objective analysis, a small positive bias converted to negative over 6 additional lakes, among them the large lakes Lappajärvi in the west and Inari in the north. The mean absolute error decreased from forecast to analysis in every lake.

In the frequency distributions, the warm temperatures are evidently related to summer. For FLake, the overestimation of maximum temperatures, especially in shallow lakes, is a known feature (e.g. Kourzeneva 2014). It is related to the difficulty of forecasting the mixed layer thermodynamics under strong solar heating. Cold and subzero temperatures occur in spring and autumn. In a few large lakes like Saimaa, Haukivesi, Pielinen, LSWT tends to be slightly underestimated in autumn both according to the FLake and the analysis (not shown). However, as will be shown in Sections 4.2 and 4.3, the cold left-hand side columns in the frequency distributions are mainly related to spring, when HIRLAM/FLake tends to melt the lakes significantly too early.

There are problems, especially in the analysed LSWT, over (small) lakes of irregular form that fit poorly the HIRLAM grid and where the measurements may represent more the local than the mean or typical conditions over the lake. These are the only ones where an underestimation of summer LSWT can be seen. Cases occur where FLake results differ so much from the observations that the quality control of the HIRLAM surface data assimilation rejects the observations, forcing also the analysis to follow the incorrect forecast (not shown).



## 4 Results

### 4.1 Analysed and forecast LSWT at observation points

Figure 3 shows the frequency distribution of LSWT according to FLake forecast and SYKE observations. It is evident that the amount of data in the class of temperatures which represents frozen conditions (LSWT flag value 272 K) was underestimated by the forecast (Figure 3a). When subzero temperatures were excluded from the comparison (Figure 3b), underestimation in the colder temperature classes and overestimation in the warmer classes still remains.

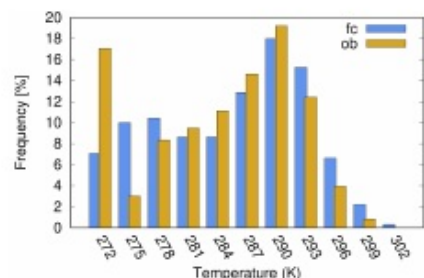

(a) with all temperatures (also frozen conditions) included

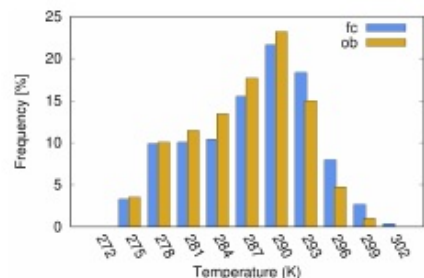

(b) only open water temperatures included

**Figure 3.** Frequency of observed (ob, yellow) and forecast (fc, blue) LSWT over all 27 SYKE lakes 2012-2018. x-axis: LSWT, unit K, y-axis: frequency, unit %.

LSWT analysis (Figure 4) improved the situation somewhat but the basic features remain. This is due to the dominance of FLake forecast via the background of the analysis. In Section 4.3, we will show time-series illustrating the physics behind these LSWT statistics.

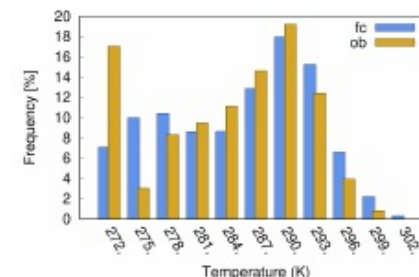

(a) with all temperatures (also frozen conditions) included

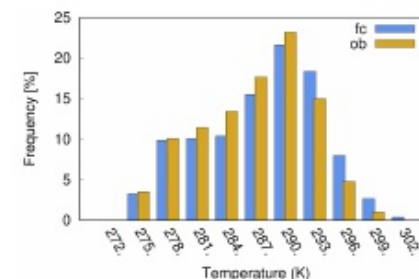

(b) only open water temperatures included

**Figure 3.** Frequency of observed (yellow) and forecast (blue) LSWT over all 27 SYKE lakes 2012-2018. x-axis: LSWT, unit K, y-axis: frequency, unit %.

### 4.2 Freezing and melting dates

Statistics of the error in melting and freezing dates are shown in Table 3. 'LSWT an' refers to the melting/freezing dates computed from analysed lake surface temperature and 'IceD fc' to those estimated from the forecast ice thickness. Over the 45 lakes included in this comparison, the number of cases of melting was 288 as estimated from the analyzed LSWT and 258 as estimated from the forecast ice thickness. The difference is due to starting time of our data. When the data started at the 1st of April 2012, at several stations the lake was already open according to FLake forecast while the analysed LSWT still indicated frozen conditions. For freezing, the number of cases was 233 according to both estimates. As the data contains the time period from the 1st April 2012 to the 30th June 2018, the maximum number of freezing events on an individual lake is six and that of melting events seven. In practice, the number may be less for some lakes because of missing observations.

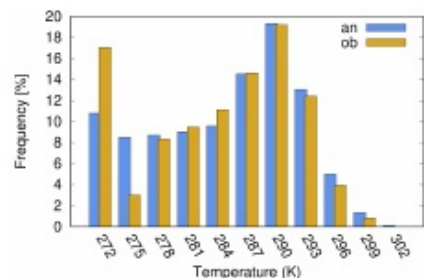

(a) with all temperatures (also frozen conditions) included

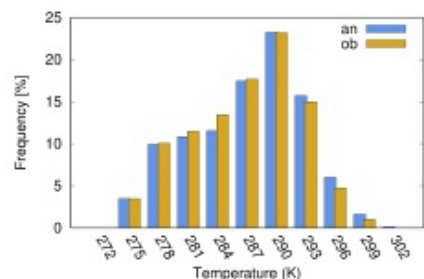

(b) only open water temperatures included

Figure 4. As for Figure 3 but for observed and analysed (an) LSWT.

Table 2 confirms the warm bias by FLake in the unfrozen conditions. Similar results were obtained for all stations together and also for our example lakes Lappajärvi and Kilpisjärvi, to be discussed in detail in Section 4.3. There were three lakes with negative LSWT bias according to FLake forecast, namely the large lakes Saimaa and Päijänne and the smaller Ala-Rieveli. After the correction by objective analysis, a small positive bias converted to negative over 6 additional lakes, among them the large lakes Lappajärvi in the west and Inari in the north. The mean absolute error decreased from forecast to analysis on every lake.

In the frequency distributions, the warm temperatures were evidently related to summer. For FLake, the overestimation of maximum temperatures, especially in shallow lakes, is a known feature (e.g. Kourzeneva 2014). It is related to the difficulty of forecasting the mixed layer thermodynamics under strong solar heating. Cold and subzero temperatures occurred in spring and autumn. In a few large lakes like Saimaa, Haukivesi, Pielinen, LSWT tended to be slightly underestimated in autumn both according to the FLake and the analysis (not shown). The cold left-hand side columns in the frequency distributions (Figures 3a

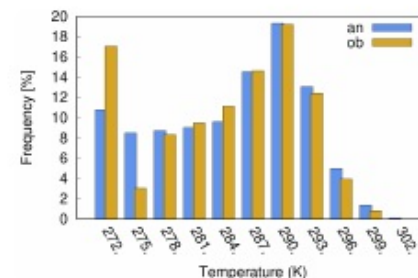

(a) with all temperatures (also frozen conditions) included

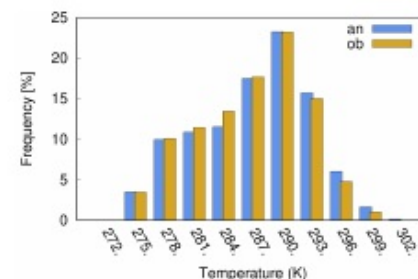

(b) only open water temperatures included

Figure 4. As for Figure 3 but for observed and analysed LSWT.

Figure 5 shows the frequency distribution of the error of freezing dates. Definition of the freezing date from the ice thickness by FLake gave slightly more occurrences in the unbiased class (error between -5 - +5 days), compared to the estimate from the analysed LSWT. Of all cases 48 % and 40 % fell in this class according to ice thickness and LSWT, respectively. In 16% / 20% of cases the freezing occurs more than five days too late and only in 9% / 11% cases more than two weeks too late. This class of more than two weeks too late freezing consists of 25 cases which are distributed over 15 lakes, thus in most cases one event per lake. This suggests that the error is related more to individual years than to systematically problematic lakes. It is worth noting, that cases where the error is over 45 days, are all but one due to one lake, Kevojärvi which is situated in the very north of Finland. This lake is narrow, with an area of 1 km<sup>-2</sup>, and situated in a steep canyon. Therefore it is poorly represented by the HIRLAM grid and both FLake and analysis results seem unreliable.

Concerning the cases of too early freezing, in 44% / 32% of the cases freezing occurs more than five days too early and in 19% / 15% more than two weeks too early. The last mentioned 15% (34 cases) are distributed over 19 lakes. Each of the five



**Table 2.** Statistical scores for LSWT at all stations and at two selected stations

| station<br>unit | fc or an | mean ob<br>K | bias<br>K | mae<br>K | stde<br>K | N     |
|-----------------|----------|--------------|-----------|----------|-----------|-------|
| ALL             | fc       | 286.3        | 0.91      | 1.94     | 2.34      | 30877 |
|                 | an       | 286.3        | 0.35      | 1.32     | 1.72      | 30861 |
| Lappajärvi      | fc       | 286.9        | 0.33      | 1.23     | 1.62      | 1243  |
|                 | an       | 286.9        | -0.65     | 1.06     | 1.10      | 1243  |
| Kilpisjärvi     | fc       | 281.7        | 1.82      | 2.13     | 2.15      | 780   |
|                 | an       | 281.7        | 1.10      | 1.42     | 1.51      | 780   |

Statistics over days when both forecast/analysis and observation indicate unfrozen conditions. bias = systematic difference fc/an - ob, mae = mean absolute error, stde = standard deviation of the error, N = number of days (06 UTC comparison, no ice).

and 4a) are mainly related to spring, when HIRLAM/FLake tended to melt the lakes significantly too early (Sections 4.2 and 4.3).

There are problems, especially in the analysed LSWT, over (small) lakes of irregular form that fit poorly the HIRLAM grid and where the measurements may represent more the local than the mean or typical conditions over the lake. These are the only ones where an underestimation of summer LSWT was seen. Cases occurred where FLake results differ so much from the observations that the HIRLAM quality control against background values rejected the observations, forcing also the analysis to follow the incorrect forecast (not shown).

#### 4.2 Freezing and melting dates

In this section the freezing and melting dates from HIRLAM are verified against corresponding observed dates over 45 lakes (Appendix Table A2). In the following, 'LSWT an' refers to the LID estimated from analysed LSWT and 'IceD fc' to those estimated from the forecast ice thickness by FLake. The time period contains six freezing periods (from autumn 2012 to autumn 2017) and seven melting periods (from spring 2012 to spring 2018). Due to some missing data the number of freezing cases was 233 and melting cases 258. The 'IceD fc' data for the first melting period in spring 2012 was missing. The overall statistics of the error in freezing and melting dates are shown in Table 3. In most cases the difference in error between the dates based on forecast and analysis was small. This is natural as the first guess of the LSWT analysis is the forecast LSWT by FLake. We will discuss next the freezing, then the melting dates.

The bias in the error of freezing dates was small according to both 'IceD fc' and 'LSWT an', -0.3 and -3.5 days, respectively. The minimum and maximum errors were large in both cases: the maximum freezing day occurred about two months too late the minimum about one and a half months too early. However, as will be shown later, the largest errors mostly occurred on a few problematic lakes while in most cases the errors were reasonable.

**Table 2.** Statistical scores for LSWT at all and two selected stations

| station     | fc or an | mean ob | bias  | mae  | stde | N     |
|-------------|----------|---------|-------|------|------|-------|
| ALL         | fc       | 286.3   | 0.91  | 1.94 | 2.34 | 30877 |
|             | an       | 286.3   | 0.35  | 1.32 | 1.72 | 30861 |
| Lappajärvi  | fc       | 286.9   | 0.33  | 1.23 | 1.62 | 1243  |
|             | an       | 286.9   | -0.65 | 1.06 | 1.10 | 1243  |
| Kilpisjärvi | fc       | 281.7   | 1.82  | 2.13 | 2.15 | 780   |
|             | an       | 281.7   | 1.10  | 1.42 | 1.51 | 780   |

Statistics over days when both forecast/analysis and observation indicate unfrozen conditions. bias = systematic difference fc/an - ob, mae = mean absolute error, stde = standard deviation of the error, N = number of days (06 UTC comparison, no ice).

**Table 3.** Statistical measures of the error of freezing and melting date

|          |         | bias  | stde | max | min | N   |
|----------|---------|-------|------|-----|-----|-----|
| Freezing | LSWT an | -3.5  | 17.9 | 64  | -52 | 233 |
|          | IceD fc | -0.3  | 17.8 | 67  | -41 | 233 |
| Melting  | LSWT an | -15.2 | 8.5  | 2   | -54 | 288 |
|          | IceD fc | -20.5 | 9.2  | -1  | -56 | 258 |

Denotation: LSWT an - LID estimated from analysed LSWT, IceD fc - LID estimated from forecast ice thickness.

large lakes Pielinen, Kallavesi, Haukivesi, Päijänne and Inari occur in this category three times while all other lakes together share the remaining 19 cases during the six winters.

Looking at the errors in melting dates (Figure 6), both estimates indicate too early melting and the distribution is strongly skewed towards too early dates. Based on the LSWT analysis, the maximum frequency (52 %) occurs in the class -14 - -5 days while based on the ice thickness, the maximum frequency (47 %) is in the class -24 - -15 days. The mean values are -15.2 and -20.5 days and the standard deviations are 8.5 and 9.2 days, respectively. FLake suggests only three cases in the unbiased class -4 - +5 while according to the LSWT analysis there are 12 cases in this class. Hence, the melting dates derived from analysed LSWT correspond the observations better than those derived from FLake ice thickness forecast but both are strongly biased towards too early melting. In the class where the error is over 35 days too early there are 19 cases on 12 different lakes. Four cases of these occurred in the largest error category (over 45 days) on Lake Kilpisjärvi.

If we compare the error in freezing or melting dates based on analysed LSWT on those (27) lakes where SYKE temperature observations are available and used in the analysis to the rest (18) of lakes with no observations, it appears that the differences are small (not shown). Furthermore, similar differences appear also on the error estimates based on ice thickness from FLake.

**Table 3.** Statistical measures of the error of freezing and melting date

| unit     |         | bias  | stde | max  | min  | N   |
|----------|---------|-------|------|------|------|-----|
|          |         | days  | days | days | days |     |
| Freezing | LSWT an | -3.5  | 17.9 | 64   | -52  | 233 |
|          | IceD fc | +0.3  | 17.8 | 67   | -41  | 233 |
| Melting  | LSWT an | -15.2 | 8.5  | 2    | -54  | 288 |
|          | IceD fc | -20.5 | 9.2  | +1   | -56  | 258 |

Denotation: LSWT an - LID estimated from analysed LSWT, IceD fc - LID estimated from forecast ice thickness.

Figure 5a) shows the frequency distribution of the error of freezing dates. Forecast freezing dates occurred slightly more often in the unbiased class (error between -5 - +5 days), compared to the estimated dates from the analysis. Of all cases 48 %/40 % (percentages here and in the following are given as 'IceD fc'/'LSWT an') fell into this class. In 20% / 26% of cases the freezing occurred more than five days too late and only in 11% / 9% cases more than two weeks too late. In case of 'IceD fc', the class of freezing more than 15 days too late comprised 25 cases distributed over 15 lakes, thus mostly one or two events per lake. This suggests that the error was related more to individual years than to systematically problematic lakes. It is worth noting, that of the eight cases where the error was over 45 days, six cases were due to a single lake, Lake Kevojärvi. This lake is situated in the very north of Finland. It is very small and narrow, with an area of 1 km<sup>2</sup>, and located in a steep canyon. Therefore it is poorly represented by the HIRLAM grid and the results seem unreliable.

Concerning too early freezing, in 33% / 44% of the cases freezing occurred more than five days too early and in 15% / 19% more than two weeks too early. According to the forecast, these 15% (34 cases) were distributed over 19 lakes. Each of the five large lakes Pielinen, Kallavesi, Haukivesi, Päijänne and Inari occurred in this category three times while all other lakes together shared the remaining 19 cases during the six winters.

The melting dates (Table 3) show a large negative bias, about two ('LSWT an') or three weeks ('IceD fc'), indicating that lake ice melting was systematically forecast to occur too early. However, the standard deviation of the error was only about half of that of the error of freezing dates and there were no long tails in the distribution (Figure 5b). The distribution is strongly skewed towards too early melting, but much narrower than that of freezing (Figure 5a). The large bias was most probably due to the bug of this HIRLAM version that prevented the accumulation of snow over lake ice (see also Section 4.3). The maximum frequency (47 %) was in the class -24 - -15 days for 'IceD fc', while in case of 'LSWT an', the maximum frequency (52 %) occurred in the class -14 - -5 days. FLake forecast 'IceD fc' suggested only three cases in the unbiased class -4 - +5 while according to 'LSWT an' there were 12 cases in this class. Hence, the melting dates derived from analysed LSWT corresponded the observations better than those derived from FLake ice thickness forecast.

Note that this kind of method of verifying LID compares two different types of data. The observations by SYKE are visual observations from the shore of the lake (see Section 3.2.2), while the freezing and melting dates from HIRLAM are based on

This suggests that the differences between these groups are related to the individual properties of the lakes: their depth, size, shape etc. rather than to the usage of LSWT observations in the analysis.

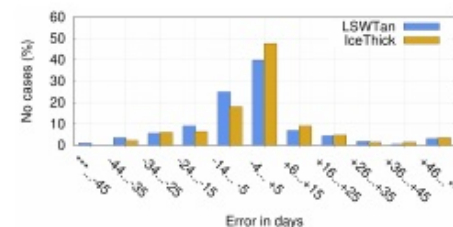

**Figure 5.** Frequency distribution of the difference between analysed/forecast and observed freezing days over all lakes 2012-2018. Variables used in diagnosis of ice existence: analysed LSWT crossing the freezing point (blue) and forecast ice thickness > 1 mm (orange). Observed variable: freezing date by SYKE. x-axis: difference (fc-ob), unit day, y-axis: percentage of all cases.

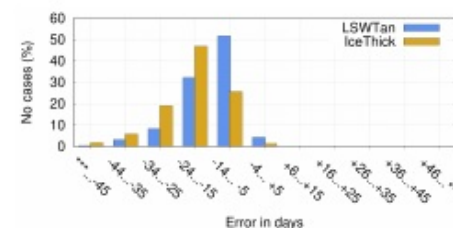

**Figure 6.** As for Figure 5 but for melting days.

We can conclude that HIRLAM/FLake succeeds rather well in predicting the freezing of Finnish lakes. Almost in half of the cases the error is less than  $\pm 5$  days. Some bias towards too early freezing can be seen. Melting is more difficult. FLake predicts melting always too early, with a mean error of over two weeks, and the LSWT analysis mostly follows it. The statistics suggest that only on a few stations the freezing or melting dates were systematically wrong during most of the years. Instead, most of the large errors were distributed among many lakes. The result of the freezing or melting dates diagnostics is somewhat sensitive to how the thresholds for freezing and melting are set. Here we used 1 mm for ice thickness and the freezing point for the LSWT analysis as the critical values.



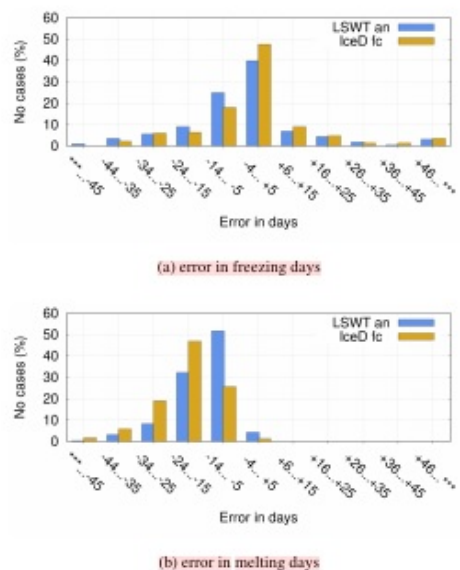

**Figure 5.** Frequency distribution of the difference between analysed/forecast and observed freezing and melting days over all lakes 2012-2018. Variables used in diagnosis of ice existence: analysed LSWT crossing the freezing point (blue) and forecast ice thickness > 1 mm (magenta). Observed variable: freezing date by SYKE. x-axis: difference (fc-ob), unit day, y-axis: percentage of all cases.

single-gridpoint values of LSWT or ice thickness (see Section 3.3.2). In addition, the resulting freezing and melting dates from HIRLAM are somewhat sensitive to definition of the freezing and melting thresholds. Here we used 1 mm for the forecast ice thickness and the freezing point for the LSWT analysis as the critical values.

In conclusion, the validation statistics show that HIRLAM/FLake succeeded rather well in predicting freezing of Finnish lakes. Almost in half of the cases the error was less than  $\pm 5$  days. Some bias towards too early freezing can be seen both in forecast and in the analysis. Melting was more difficult. FLake predicted ice melting always too early, with a mean error of over two weeks, and the analysis mostly followed it. These results are rather obvious because of the missing snow on ice.

### 4.3 Comparisons on three lakes

In this section we combine the analysis of LSWT time-series and LID for two representative lakes, Kilpisjärvi in the north and Lappajärvi in the west (see the map in Figure 2). Observed and forecast ice and snow thickness are discussed, using also additional data from Lake Simpelejärvi in the south-east of Finland.

- 5 Lake Kilpisjärvi is an Arctic lake at the elevation of 473 m, surrounded by fells. Its average/maximum depth is 22.5/57 m and the surface area 37.33 km<sup>2</sup>. The heat balance as well as the ice and snow conditions on Lake Kilpisjärvi have been a subject of several studies (Leppäranta et al., 2012; Lei et al., 2012; Yang et al., 2013). Typically, the ice season lasts there seven months from November to May. Lake Lappajärvi is formed from a 23 km wide meteorite impact crater, which is estimated to be 76 million years old. It is Europe's largest crater lake with a surface area of 145.5 km<sup>2</sup> and an average/maximum depth of 12/36 m.
- 10 Here the climatological ice season is shorter, typically about five months from December to April. The average/maximum depth of Lake Simpelejärvi is 9.3/34.4 m and the surface area 88.2 km<sup>2</sup>. This lake is located at the border between Finland and Russia and belongs to the catchment area of Europe's largest lake, Lake Ladoga in Russia.

Figures 7 - 10 show the frequency distributions of LSWT according to the observations v.s. forecast and analysis for these lakes. Features common to the majority of lakes (Section 4.1) are seen, i.e. underestimation of the amount of cold temperature cases and overestimation of the warmer temperatures by the forecast and analysis. On Lake Lappajärvi, only the amount of below-freezing temperatures is clearly underestimated, otherwise the distributions look quite balanced. According to the observations, on Lake Kilpisjärvi the days with frozen surface dominate during the April–November periods. According to both FLake forecast and HIRLAM LSWT analysis the amount of these days is clearly smaller.

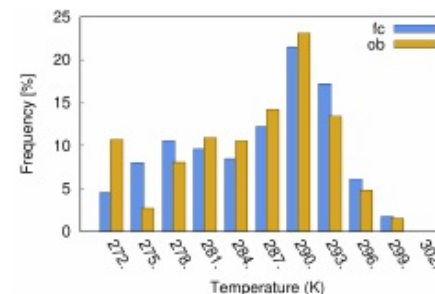

**Figure 7.** As for Figure 3a) but for Lake Lappajärvi, with all temperatures included.

Yearly time series of the observed, forecast and analysed LSWT, with the observed LID marked, are shown in Figures 11 and 12. In the absence of observations, the HIRLAM analysis follows the forecast. Missing data in the time series close to freezing and melting are due to missing observations, hence missing information in the feedback files (see Section 2.2). Differences between the years due to the different prevailing weather conditions can be seen in the temperature variations.

### 4.3 Comparisons on three lakes

In this section we present LSWT and LID time-series for two representative lakes, Kilpisjärvi in the north and Lappajärvi in the west (see the map in Figure 2). Observed and forecast ice and snow thickness are discussed, using also additional data from Lake Simpelejärvi in southeastern Finland.

5 Lake Kilpisjärvi is an Arctic lake at the elevation of 473 m, surrounded by fells. The lake occupies 40 % of the area of HIRLAM gridsquare covering it (the mean elevation of the gridsquare is 614 m). The average/maximum depths of the lake are 19.5/57 m and the surface area is 37.3 km<sup>2</sup>. The heat balance as well as the ice and snow conditions on Lake Kilpisjärvi have been subject to several studies (Leppäranta et al., 2012; Lei et al., 2012; Yang et al., 2013). Typically, the ice season lasts there seven months from November to May. Lake Lappajärvi is formed from a 23 km wide meteorite impact crater, which is estimated to be 76 million years old. It is Europe's largest crater lake with a surface area of 145.5 km<sup>2</sup> and an average/maximum depth of 6.9/36 m. Here the climatological ice season is shorter, typically about five months from December to April. The average/maximum depth of Lake Simpelejärvi is 8.7/34.4 m and the surface area 88.2 km<sup>2</sup>. This lake is located at the border between Finland and Russia and belongs to the catchment area of Europe's largest lake, Lake Ladoga in Russia.

15 Figures 6 and 7 show the frequency distributions of LSWT according to forecast v.s. observation and analysis v.s. observation for Lappajärvi and Kilpisjärvi. Features similar to the results averaged over all lakes (Section 4.1, Figures 3 and 4) are seen, i.e. underestimation of the amount of cold temperature cases and overestimation of the warmer temperatures by the forecast and analysis. On Lake Lappajärvi, only the amount of below-freezing temperatures was clearly underestimated, otherwise the distributions look quite balanced. According to the observations, on Lake Kilpisjärvi ice-covered days dominated during the periods from April to November. According to both FLake forecast and HIRLAM LSWT analysis the amount of these days was clearly smaller.

Yearly time series of the observed, forecast and analysed LSWT, with the observed LID marked, are shown in Figures 8 and 9. In the absence of observations, the HIRLAM analysis followed the forecast. Missing data in the time series close to freezing and melting are due to missing observations, hence missing information in the feedback files (see Section 2.2). Differences between the years due to the different prevailing weather conditions can be seen in the temperature variations.

25 Generally, FLake tended to melt the lakes too early in spring, as already indicated by the LID statistics (Section 4.2). The too early melting and too warm LSWT in summer show up clearly in Kilpisjärvi (Figure 9). In Lappajärvi, the model and analysis were able to follow even quite large and quick variations of LSWT in summer, but tended to somewhat overestimate the maximum temperatures. Overestimation of the maximum temperatures by FLake was still more prominent in shallow lakes (not shown). In autumn over Lakes Lappajärvi and Kilpisjärvi, the forecasts and analyses followed closely the LSWT observations and reproduced the freezing dates within a few days, which was also typical to the majority of lakes.

30 Figure 10 shows a comparison of forecast and observed evolution of ice thickness and snow depth on Lappajärvi, Kilpisjärvi and Simpelejärvi in winter 2012-2013, typical also for the other lakes and years studied. In all three lakes, the ice thickness started to grow after freezing both according to the forecast and the observations. In the beginning HIRLAM/FLake ice grew faster than observed. However, according to the forecast ice thickness started to decrease in March of every year but according

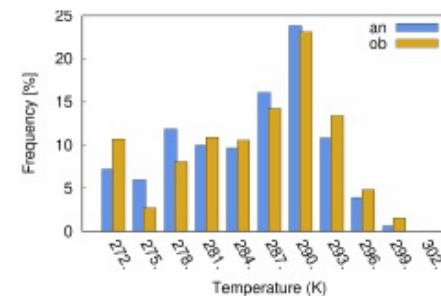

Figure 8. As for Figure 4a) but for Lake Lappajärvi

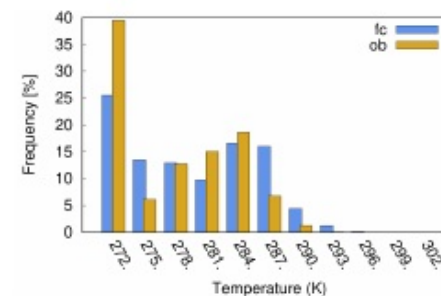

Figure 9. As for Figure 7 but for Lake Kilpisjärvi.

Generally, in spring FLake tends to melt the lakes too early, as already indicated by the LID statistics (Section 4.2). The too early melting and too warm LSWT in summer show up clearly in Kilpisjärvi (Figure 12). In Lappajärvi, the model and analysis are able to follow even quite large variations of LSWT in summer, but tend to somewhat overestimate the maximum temperatures. Overestimation of the maximum temperatures by FLake is still more prominent in shallow lakes (not shown). In autumn over Lakes Lappajärvi and Kilpisjärvi, the forecasts and analyses follow closely the LSWT observations and reproduce the freezing date within a few days, which is also typical to the majority of lakes.

Figure 13 shows a comparison of forecast and observed evolution of ice and snow thickness on Lappajärvi, Kilpisjärvi and Simpelejärvi in winter 2012-2013, typical also for the other lakes and years studied. In all three lakes, the ice thickness starts to grow after freezing both according to the forecast and the observations. In the beginning HIRLAM/FLake ice grows faster than observed. However, according to the forecast ice thickness starts to decrease in March of every year but according to the



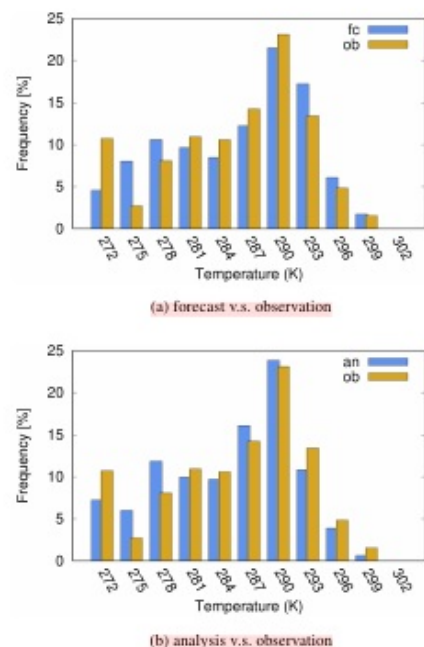

**Figure 6.** Frequency of observed (yellow) and forecast or analysed (blue) LSWT over Lake Lappajärvi 2012-2018, all temperatures included. x-axis: LSWT, unit K, y-axis: frequency, unit %.

to the observations only a month or two later. The most remarkable feature is that there was no snow in the FLake forecast. It was found that this was due to a coding error in the HIRLAM reference version 7.4 which is applied operationally in FMI.

The too early melting of ice in the absence of snow could be explained by the wrong absorption of the solar energy in the model. In reality, the main factor of snow and ice melt in spring is the increase of daily solar radiation. In HIRLAM, the downwelling short-wave irradiance at the surface is known to be reasonable, with some overestimation of the largest clear-sky fluxes and all cloudy fluxes (Rontu et al., 2017). Over lakes, HIRLAM/FLake uses constant values for the snow and ice shortwave reflection, with albedo values of 0.75 and 0.5, correspondingly. When there was no snow, the lake surface was thus assumed too dark. 25 % more absorption of an assumed maximum solar irradiance of  $500 \text{ Wm}^{-2}$  (valid for the latitude of Lappajärvi in the end of March) would mean availability of extra  $125 \text{ Wm}^{-2}$  for melting of the ice, which corresponds the magnitude of increase of available maximum solar energy within a month at the same latitude.

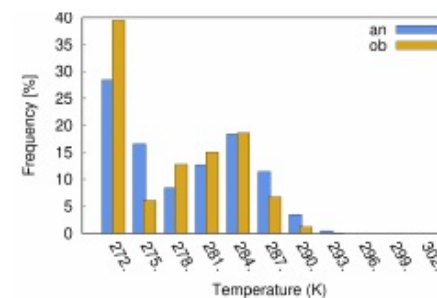

**Figure 10.** As for Figure 8 but for Lake Kälviälampi.

observations only a month or two later. The most remarkable feature is that there is no snow in the FLake forecast. It was found that this was due to a coding error in the HIRLAM reference version 7.4 which is applied operationally in FMI.

The too early melting of ice in the absence of snow could be explained by the wrong absorption of the solar energy in the model. In reality, the main factor of snow and ice melt in spring is the increase of daily solar radiation. In HIRLAM, the downwelling short-wave irradiance at the surface is known to be reasonable, with some overestimation of the largest clear-sky fluxes and all cloudy fluxes (Rontu et al., 2017). Over lakes, HIRLAM/FLake uses constant values for the snow and ice shortwave reflection, with albedo values of 0.75 and 0.5, correspondingly. When there was no snow, the lake surface was thus assumed too dark. 25 % more absorption of an assumed maximum solar irradiance of  $500 \text{ Wm}^{-2}$  (valid for the latitude of Lappajärvi in the end of March) would mean availability of extra  $125 \text{ Wm}^{-2}$  for melting of the ice, which corresponds the magnitude of increase of available maximum solar energy within a month at the same latitude.

The forecast of too thick ice can also be explained by the absence of snow in the model. When there is no insulation by the snow layer, the longwave cooling of the ice surface in clear-sky conditions is more intensive and leads to faster growth of ice compared to the situation of snow-covered ice. In nature, ice growth can also be due to the snow transformation, a process whose parametrization in the models is demanding (Yang et al., 2013; Cheng et al., 2014).

## 5 Conclusions and outlook

In this study, *in-situ* lake observations from the Finnish Environment Institute were used for validation of the HIRLAM NWP model, which is applied operationally in the Finnish Meteorological Institute. It contains Freshwater Lake prognostic parametrizations and an independent objective analysis of lake surface state. We focused on comparison of observed and forecast lake surface water temperature, ice and snow thickness in the years 2012 - 2018. Because the HIRLAM/FLake system was unmodified during this period, a long uniform dataset was available for evaluation of the performance of FLake integrated in an operational NWP model.

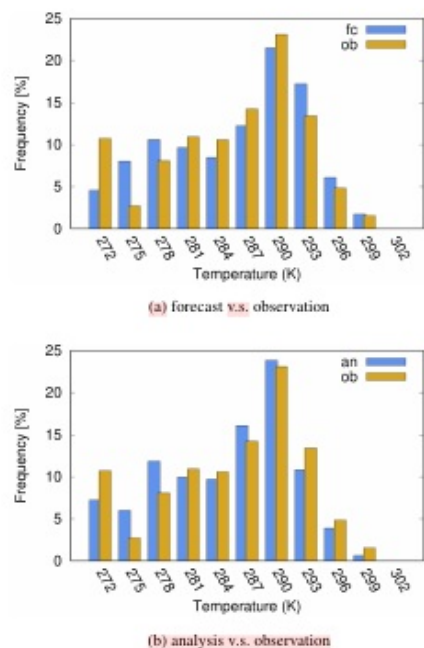

Figure 7. As for Figure 6 but for Lake Kilpisjärvi.

The forecast of too thick ice can also be explained by the absence of snow in the model. When there is no insulation by the snow layer, the longwave cooling of the ice surface in clear-sky conditions is more intensive and leads to faster growth of ice compared to the situation of snow-covered ice. In nature, ice growth can also be due to the snow transformation, a process whose parametrization in the models is demanding (Yang et al., 2013; Cheng et al., 2014).

- 5 Also the downwelling longwave radiation plays a role in the surface energy balance. We may expect values from  $150 \text{ Wm}^{-2}$  to  $400 \text{ Wm}^{-2}$  in the Nordic spring conditions, with the largest values related to cloudy and the smallest to clear-sky situations. The standard deviation of the predicted by HIRLAM downwelling longwave radiation fluxes has been shown to be of the order of  $20 \text{ Wm}^{-2}$ , with a positive systematic error of a few  $\text{Wm}^{-2}$  (Rontu et al., 2017). Compared to the systematic effects related to absorption of the solar radiation, the impact of the longwave radiation variations on lake ice evolution is presumably small.

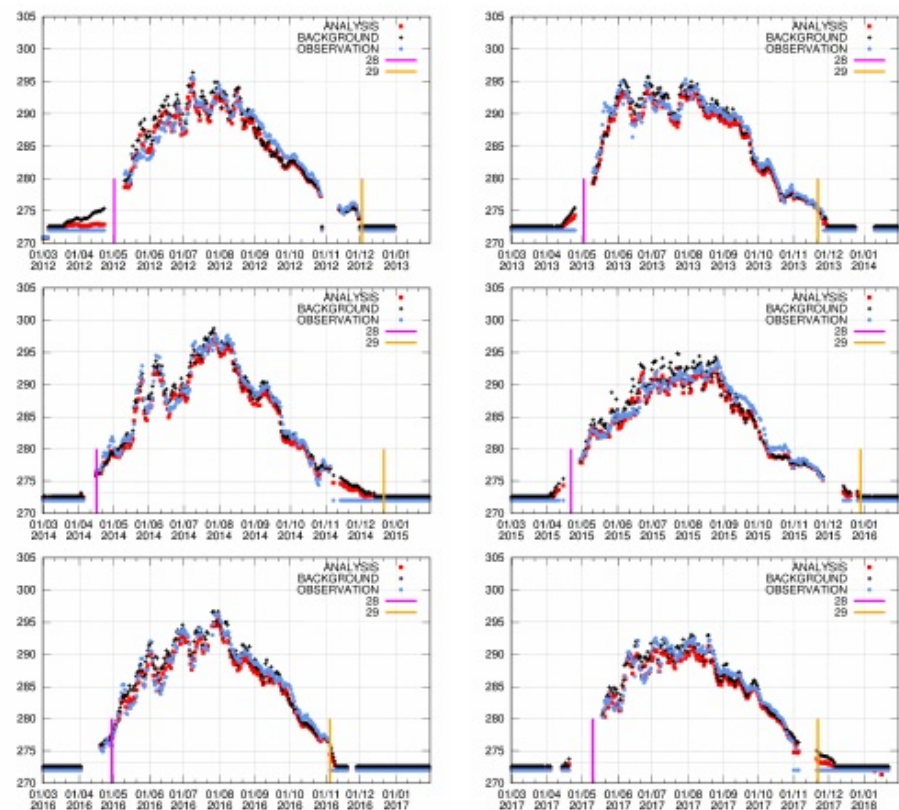

Figure 11. Time-series of the observed, analysed and forecast LSWT at the Lappajärvi observation location 23.67 E, 63.15 N for the years 2012–2018 based on 06 UTC data. Markers are shown in the inserted legend. Observed freezing date (blue) and melting date (red) are marked with vertical lines.

On average, the forecast and analysed LSWT were warmer than observed with systematic errors of 0.91 K and 0.35 K, correspondingly. The mean absolute errors were 1.94 and 1.32 K. Thus, the independent observation-based analysis of *in-situ* LSWT observations was able to improve the FLake +6 h forecast used as the first guess. However, the resulting analysis is by definition not used for correction of the FLake forecast but remains an independent by-product of HIRLAM.



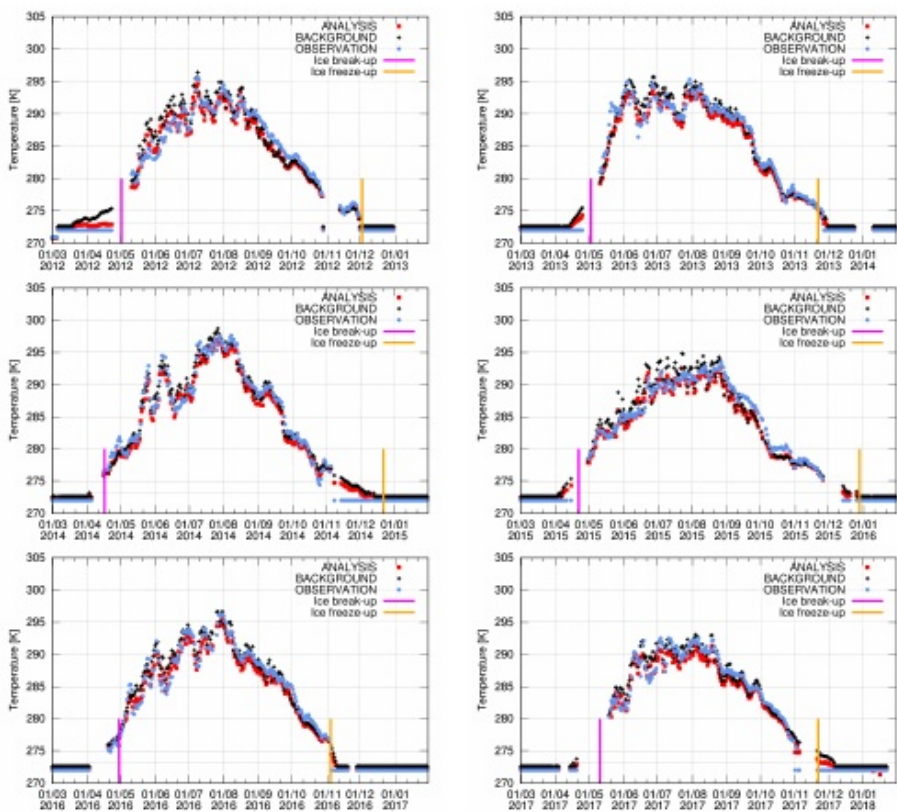

**Figure 8.** Time-series of the observed, analysed and forecast LSWT at the Lappajärvi observation location 23.67 E, 63.15 N for the years 2012–2018 based on 06 UTC data. Markers are shown in the inserted legend. Observed freezing date (blue) and melting date (red) are marked with vertical lines.

### 5 Conclusions and outlook

In this study, *in-situ* lake observations from the Finnish Environment Institute were used for validation of the HIRLAM NWP model, which is applied operationally in the Finnish Meteorological Institute. HIRLAM contains Freshwater Lake prognostic

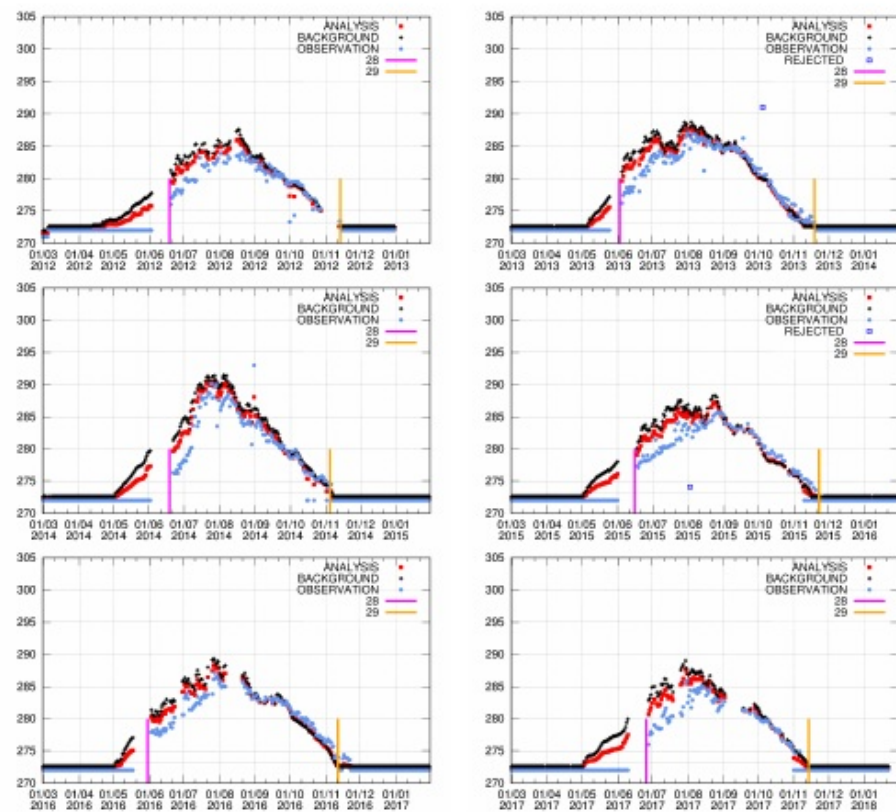

**Figure 12.** As for Figure 11 but for lake Kälviäsjärvi, 20.82 E, 69.01 N.

An overestimation of the LSWT summer maxima was found, especially for shallow lakes. This behaviour of FLake is well known, documented earlier e.g. by Kourzeneva (2014). It arises due to the difficulty to handle correctly the mixing in the near-surface water layer that is intensively heated by the sun.

Forecast freezing dates were found to correspond the observations well, typically within a week. The forecast ice thickness tended to be overestimated, still the melting dates over most of the lakes occurred systematically several weeks too early. Practically no forecast snow was found on the lake ice, although the snow parametrization by FLake was included in

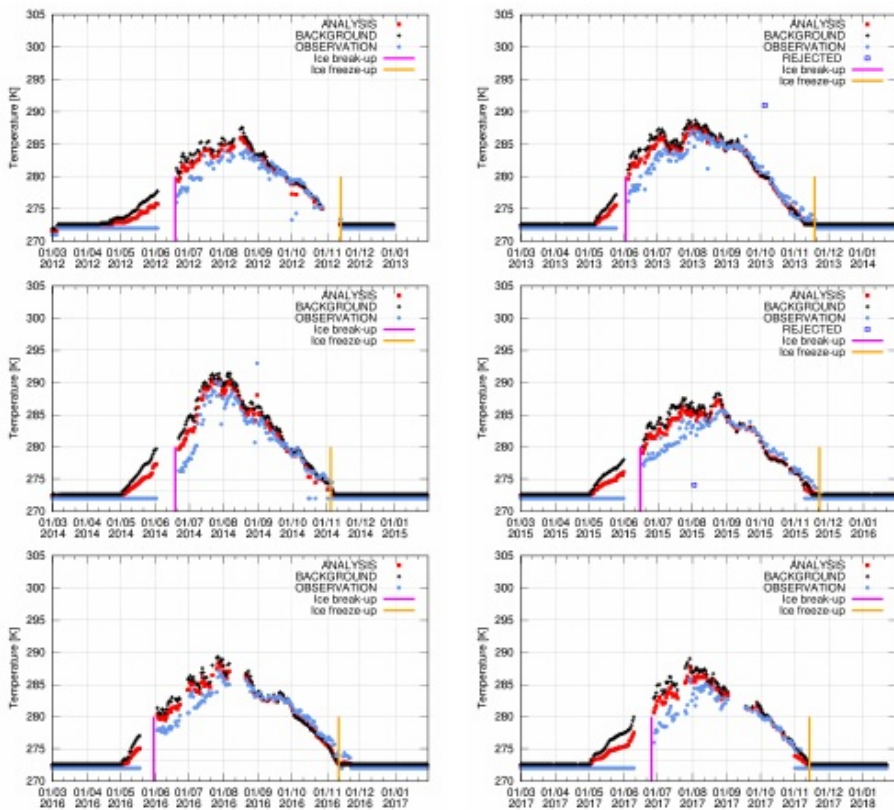

Figure 9. As for Figure 8 but for lake Kälviälampi, 20.82 E, 69.01 N.

parametrizations and an independent objective analysis of lake surface state. We focused on comparison of observed and forecast lake surface water temperature, ice thickness and snow depth in the years 2012 - 2018. Because the HIRLAM/FLake system was unmodified during this period, a long uniform dataset was available for evaluation of the performance of FLake integrated into an operational NWP model. On the other hand, no conclusions about the impact of the lake surface state on the operational forecast of the near-surface temperatures, cloudiness or precipitation can be drawn because of the lack of alternative (without FLake) forecasts for comparison.

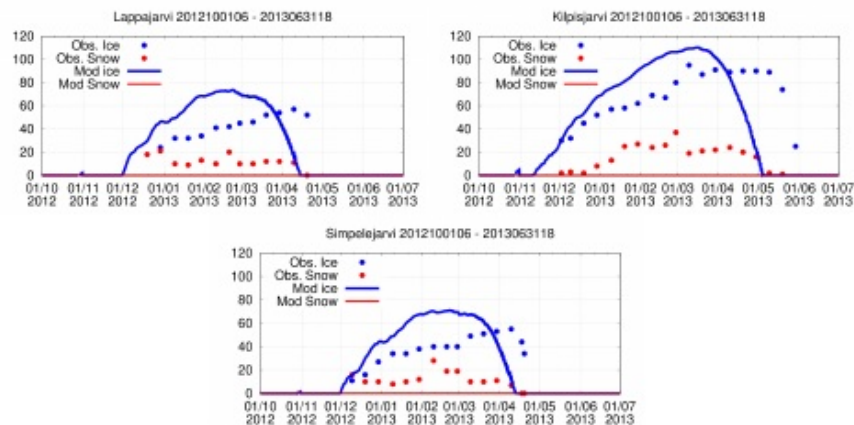

Figure 13. Evolution of ice (blue) and snow (red) thickness at Lakes Lappajärvi, Kälviälampi and Simpelejärvi during winter 2012-2013.

HIRLAM. The reason for the wrong behaviour in HIRLAM was evidently related to a coding error that prevented snow accumulation on lake ice. The too early melting and overestimated ice thickness differ from the results by Pietikäinen et al. (2018); Yang et al. (2013); Kourzeneva (2014), who reported somewhat too late melting of the Finnish lakes when FLake with realistic snow parametrizations was applied within a climate model or independently, driven by NWP data. It can be concluded that a realistic parametrization of snow on lake ice is important in order to describe correctly the lake surface state in spring.

Small lakes and those of complicated geometry cause problems for the relatively coarse HIRLAM grid of 7 - kilometre resolution. The problems are related to the observation usage, forecast and validation, especially when interpolation and selection of point values are applied. The observations and model represent different spatial scales. For example, the comparison of the freezing and melting dates was based on diagnostics of single-gridpoint values that were compared to observations representing entire lakes as seen from the observation sites. Also the results of LID diagnostics were sensitive to the criteria for definition of the ice existence in HIRLAM/FLake. All this adds unavoidable inaccuracy into the model-observation intercomparison but does not change the main conclusions of the present study.

SYKE LSWT observations used for the real-time analysis are regular and reliable but did not always cover the days immediately after melting or close to freezing, partly because the quality control of HIRLAM LSWT analysis utilizes the SYKE statistical lake water temperature model results in a too strict way. Although the 27 observations are located all over the country, they cover a very small part of the lakes and their availability is limited to Finland. SYKE observations of the ice and snow depth as well as the freezing and melting dates provide valuable data for the validation purposes.



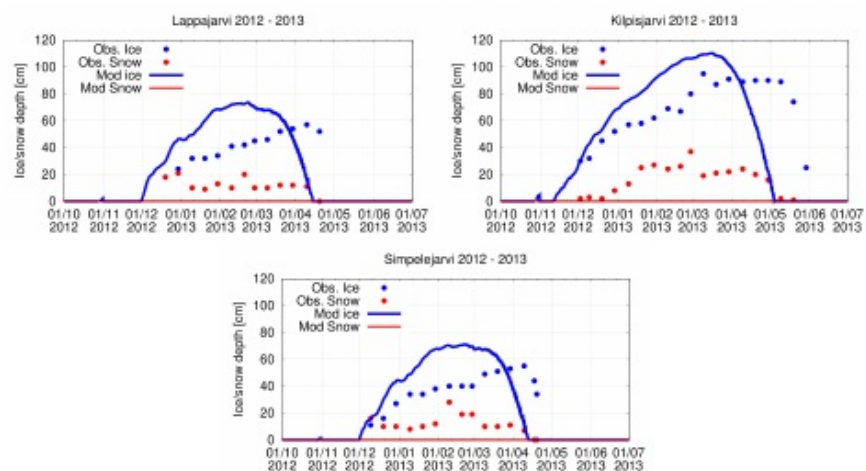

**Figure 10.** Evolution of ice (blue) and snow (red) thickness at Lakes Lappajärvi, Kilpisjärvi and Simpelejärvi during winter 2012-2013.

On average, the forecast and analysed LSWT were warmer than observed with systematic errors of 0.91 K and 0.35 K, correspondingly. The mean absolute errors were 1.94 and 1.32 K. Thus, the independent observation-based analysis of *in-situ* LSWT observations was able to improve the FLake +6 h forecast used as the first guess. However, the resulting analysis is by definition not used for correction of the FLake forecast but remains an independent by-product of HIRLAM. An overestimation of the FLake LSWT summer maxima was found, especially for the shallow lakes. This behaviour of FLake is well known, documented earlier e.g. by Kourzeneva, 2014. It arises due to the difficulty to handle correctly the mixing in the near-surface water layer that is intensively heated by the sun.

Forecast freezing dates were found to correspond the observations well, typically within a week. The forecast ice thickness tended to be overestimated, still the melting dates over most of the lakes occurred systematically several weeks too early. Practically no forecast snow was found on the lake ice, although the snow parametrization by FLake was included in HIRLAM. The reason for the incorrect behaviour was evidently related to a coding error in HIRLAM that prevented snow accumulation on lake ice. The too early melting and overestimated ice thickness differ from the results by Pietikäinen et al., 2018; Yang et al., 2013; Kourzeneva, 2014, who reported somewhat too late melting of the Finnish lakes when FLake with realistic snow parametrizations was applied within a climate model or stand-alone driven by NWP data. It can be concluded that a realistic parametrization of snow on lake ice is important in order to describe correctly the lake surface state in spring.

A need for minor technical corrections in the FMI HIRLAM/FLake system was revealed. The snow accumulation bug was corrected in October 2018, based on our findings. Further developments and modifications are not foreseen because the HIRLAM NWP systems, applied in the European weather services, are being replaced by kilometre-scale HARMONIE-AROME-based operational systems (Bengtsson et al., 2017), where the prognostic FLake parametrizations are also available.

5 HARMONIE/FLake uses the newest version of the global lake database (GLDB v.3) and contains updated snow and ice properties that were suggested by (Yang et al., 2013). The objective analysis of lake surface state is yet to be implemented into HARMONIE-AROME, taking into account the HIRLAM experience summarized in this study and earlier by Kheyrollah Pour et al. (2017).

*Data availability.* All observational data was obtained from SYKE open data archive SYKE (2018). The data files picked from HIRLAM archive are attached as supplementary files: data from the objective analysis feedback files (observed, analysed, forecast LSWT interpolated to the 27 active station locations) and from the gridded output of the HIRLAM analysis (analysed LSWT, forecast ice and snow thickness from the nearest gridpoint of all locations used in the present study).

Small lakes and those of complicated geometry cause problems for the relatively coarse HIRLAM grid of 7 - kilometre resolution. The problems are related to the observation usage, forecast and validation, especially when interpolation and selection of point values are applied. The observations and model represent different spatial scales. For example, the comparison of the freezing and melting dates was based on diagnostics of single-gridpoint values that were compared to observations representing entire lakes as overseen from the observation sites. Also the results of LID diagnostics were sensitive to the criteria for definition of the ice existence in HIRLAM/FLake. All this adds unavoidable inaccuracy into the model-observation intercomparison but does not change the main conclusions of the present study.

SYKE LSWT observations used for the real-time analysis are regular and reliable but do not always cover the days immediately after melting or close to freezing, partly because the quality control of HIRLAM LSWT analysis utilizes the SYKE statistical lake water temperature model results in a too strict way. Although the 27 observations are located all over the country, they cover a very small part of the lakes and their availability is limited to Finland. SYKE observations of the ice and snow depth as well as the freezing and melting dates provide valuable data for the validation purposes.

A need for minor technical corrections in the FMI HIRLAM/FLake system was revealed. The snow accumulation bug was corrected in October 2018, based on our findings. Further developments and modifications are not foreseen because the HIRLAM NWP systems, applied in the European weather services, are being replaced by kilometre-scale ALADIN-HIRLAM forecasting systems (Termonia et al., 2018; Bengtsson et al., 2017), where the prognostic FLake parametrizations are also available. HARMONIE/FLake uses the newest version of the global lake database (GLDB v.3) and contains updated snow and ice properties that were suggested by Yang et al., 2013. The objective analysis of lake surface state is yet to be implemented, taking into account the HIRLAM experience summarized in this study and earlier by Kheyrollah Pour et al., 2017. In the future, an important source of wider observational information on lake surface state are the satellite measurements, whose operational application in NWP models still requires further work.

*Code and data availability.* Observational data was obtained from SYKE open data archive SYKE, 2018 as follows: LID was fetched 15.8.2018, snow depth 17.9.2018 and ice thickness 16.10.2018 from <http://rajapinnat.ymparisto.fi/api/Hydrologiarajapinta/1.0/odataquerybuilder/>. A supplementary file containing the freezing and melting dates as picked and prepared for the lakes studied here is attached. Data picked from HIRLAM archive are attached as supplementary files: data from the objective analysis feedback files (observed, analysed, forecast LSWT interpolated to the 27 active station locations) and from the gridded output of the HIRLAM analysis (analysed LSWT, forecast ice and snow thickness from the nearest gridpoint of all locations used in the present study).

In this study, FMI operational weather forecasts resulting from use of HIRLAM v.7.4 (rc1, with local updates) were validated against lake observations. The HIRLAM reference code is not open software but the property of the international HIRLAM-C programme. For research purposes, the codes can be requested from the programme ([hirlam.org](http://hirlam.org)). The source codes of the version operational at FMI, relevant for the present study, are available from the authors upon request.

Table A1. Prognostic and diagnostic lake variables within HIRLAM

| variable                               | unit      | type                                                        |
|----------------------------------------|-----------|-------------------------------------------------------------|
| temperature of snow on lake ice        | K         | prog by FLake                                               |
| temperature of lake ice                | K         | prog by FLake                                               |
| mean water temperature                 | K         | prog by FLake                                               |
| mixed layer temperature                | K         | prog by FLake                                               |
| bottom temperature                     | K         | prog by FLake                                               |
| temperature of upper layer sediments   | K         | prog by FLake                                               |
| mixed layer depth                      | m         | prog by FLake                                               |
| thickness of upper layer sediments     | m         | prog by FLake                                               |
| thermocline shape factor               | -         | prog by FLake                                               |
| lake ice thickness                     | m         | prog by FLake                                               |
| snow depth on lake ice                 | m         | prog by FLake                                               |
| LSWT                                   | K         | diag by FLake<br>= mixed layer temperature if no ice        |
| lake surface temperature               | K         | diag by FLake<br>uppermost temperature: LSWT or ice or snow |
| LSWT                                   | K         | anal by HIRLAM<br>flag value 272 K when there is ice        |
| lake surface roughness                 | m         | diag by HIRLAM                                              |
| screen level temperature over lake     | m         | diag by HIRLAM                                              |
| screen level abs.humidity over lake    | m         | diag by HIRLAM                                              |
| anemometer level u-component over lake | m         | diag by HIRLAM                                              |
| anemometer level v-component over lake | m         | diag by HIRLAM                                              |
| latent heat flux over lake             | $Wm^{-2}$ | diag by HIRLAM                                              |
| sensible heat flux over lake           | $Wm^{-2}$ | diag by HIRLAM                                              |
| scalar momentum flux over lake         | $Wm^{-2}$ | diag by HIRLAM                                              |
| SW net radiation over lake             | $Wm^{-2}$ | diag by HIRLAM                                              |
| LW net radiation over lake             | $Wm^{-2}$ | diag by HIRLAM                                              |
| depth of lake                          | m         | pres in HIRLAM grid                                         |
| fraction of lake                       | [0-1]     | pres in HIRLAM grid                                         |
| fraction of lake ice                   | [0-1]     | diag in HIRLAM grid                                         |

Denotation: prog = prognostic, diag = diagnostic, pres = prescribed, anal = result of OI



*Author contributions.* Laura Rontu computed the LSWT statistics based on HIRLAM feedback files. Kalle Eerola performed the freezing and melting date, snow and ice thickness comparisons based on data picked from HIRLAM grib files. Matti Horttanainen prepared observation data obtained via SYKE open data interface and lake depths from GLDB v.3. Laura Rontu composed the manuscript text based on input from all authors.

5 *Competing interests.* No competing interests are present.

*Acknowledgements.* Our thanks are due to Joni-Pekka Pietikäinen and Ekaterina Kourzeneva for discussions and information, to Margarita Choulga and Olga Toptunova for the support with the updated GLDB v.3 data, and to Emily Gleeson for advice with English language.

**Table A2.** Lakes with SYKE observations used in this study

| NAME            | LON    | LAT    | MEAND | HIRD | HIRFR | HIRID |
|-----------------|--------|--------|-------|------|-------|-------|
| Pielinen        | 29.607 | 63.271 | 11.1  | 10.0 | 0.916 | 4001  |
| Kallavesi       | 27.783 | 62.762 | 12.1  | 10.0 | 0.814 | 4002  |
| Haukivesi       | 28.389 | 62.108 | 9.0   | 10.0 | 0.725 | 4003  |
| Saimaa          | 28.116 | 61.338 | 17.0  | 10.0 | 0.950 | 4004  |
| Pääjärvi1       | 24.789 | 62.864 | 3.9   | 3.0  | 0.430 | 4005  |
| Nilakka         | 26.527 | 63.115 | 4.9   | 10.0 | 0.866 | 4006  |
| Konnevesi       | 26.605 | 62.633 | 15.9  | 10.0 | 0.937 | 4007  |
| Jääsjärvi       | 26.135 | 61.631 | 4.6   | 10.0 | 0.750 | 4008  |
| Päijänne        | 25.482 | 61.614 | 14.1  | 10.0 | 0.983 | 4009  |
| Ala-Rieveli     | 26.172 | 61.303 | 11.3  | 10.0 | 0.549 | 4010  |
| Kyyvesi         | 27.080 | 61.999 | 4.4   | 10.0 | 0.810 | 4011  |
| Tuusulanjärvi   | 25.054 | 60.441 | 3.2   | 3.0  | 0.174 | 4012  |
| Pyhäjärvi       | 22.291 | 61.001 | 5.5   | 5.0  | 0.922 | 4013  |
| Längelmävesi    | 24.370 | 61.535 | 6.8   | 10.0 | 0.875 | 4014  |
| Pääjärvi2       | 25.132 | 61.064 | 14.8  | 14.0 | 0.350 | 4015  |
| Vaskivesi       | 23.764 | 62.142 | 7.0   | 10.0 | 0.349 | 4016  |
| Kuivajärvi      | 23.860 | 60.786 | 2.2   | 10.0 | 0.419 | 4017  |
| Näsijärvi       | 23.750 | 61.632 | 14.1  | 10.0 | 0.850 | 4018  |
| Lappajärvi      | 23.671 | 63.148 | 12.0  | 10.0 | 1.000 | 4019  |
| Pesijärvi       | 28.650 | 64.945 | 7.3   | 7.0  | 0.290 | 4020  |
| Rehja-Nuasjärvi | 28.016 | 64.184 | 8.5   | 10.0 | 0.534 | 4021  |
| Oulujärvi       | 26.965 | 64.451 | 7.6   | 10.0 | 1.000 | 4022  |
| Ounasjärvi      | 23.602 | 68.377 | 6.6   | 10.0 | 0.166 | 4023  |
| Unari           | 25.711 | 67.172 | 6.1   | 10.0 | 0.491 | 4024  |
| Kilpisjärvi     | 20.816 | 69.007 | 22.5  | 22.0 | 0.399 | 4025  |
| Kevojärvi       | 27.011 | 69.754 | 7.0   | 10.0 | 0.016 | 4026  |
| Inarijärvi      | 27.924 | 69.082 | 14.4  | 14.0 | 0.979 | 4027  |
| Simpelejärvi    | 29.482 | 61.601 | 9.3   | 10.0 | 0.548 | 40241 |
| Pokkaanlahti    | 27.264 | 61.501 | 7.00  | 10.0 | 0.299 | 40261 |
| Muurasjärvi     | 25.353 | 63.478 | 9.10  | 10.0 | 0.060 | 40263 |
| Kalmarinjärvi   | 25.001 | 62.786 | 5.80  | 5.0  | 0.330 | 40271 |
| Summasjärvi     | 25.344 | 62.677 | 6.70  | 10.0 | 0.555 | 40272 |
| Iisvesi         | 27.021 | 62.679 | 17.2  | 18.0 | 0.456 | 40277 |
| Hankavesi       | 26.826 | 62.614 | 7.00  | 18.0 | 0.100 | 40278 |
| Petajavesi      | 25.173 | 62.255 | 2.70  | 3.0  | 0.245 | 40282 |
| Kukkia          | 24.618 | 61.329 | 6.00  | 10.0 | 0.299 | 40308 |
| Ähtärinjärvi    | 24.045 | 62.755 | 7.00  | 10.0 | 0.266 | 40313 |
| Kuortaneenjärvi | 23.407 | 62.863 | 7.00  | 10.0 | 0.277 | 40328 |
| Lestijärvi      | 24.716 | 63.584 | 7.00  | 10.0 | 0.513 | 40330 |

## References

- Balsamo, G., Salgado, R., Dutra, E., Boussetta, S., Stockdale, T. and Potes, M.: On the contribution of lakes in predicting near-surface temperature in a global weather forecasting model. *Tellus A*, 64, 15829, <https://doi.org/10.3402/tellusa.v64i0.15829>, 2012.
- Bengtsson, L., Andrae, U., Aspelién, T., Batrak, Y., Calvo, J., de Rooy, W., Gleeson, E., Hansen-Sass, B., Homleid, M., Hortal, M., Ivarsson, K., Lenderink, G., Niemelä, S., Pagh Nielsen, K., Onvlee, J., Rontu, L., Samuelsson, P., Santos Muñoz, D., Subias, A., Tijn, S., Toll, V., Yang, X. and Ødegaard Keltzow, M.: The HARMONIE-AROME model configuration in the ALADIN-HIRLAM NWP system. *Monthly Wea. Rev.*, 145, 1919–1935, <https://doi.org/10.1175/MWR-D-16-0417.1>, 2018.
- Cheng, B., Vihma, T., Rontu, L., Kontu A., Kheyrollah Pour, H., Duguay, C. and Pulliainen, J.: Evolution of snow and ice temperature, thickness and energy balance in Lake Orajärvi, northern Finland. *Tellus A: Dynamic Meteorology and Oceanography*, 66, 21564, <https://doi.org/10.3402/tellusa.v66.21564>.
- Choulga, M., Kourzeneva, E., Zakharova, E. and Doganovsky, A.: Estimation of the mean depth of boreal lakes for use in numerical weather prediction and climate modelling. *Tellus A*, 66, 21295, <https://doi.org/10.3402/tellusa.v66.21295>, 2014.
- Cordeira, J. M. and Laird, N. F. 2008. The influence of ice cover on two lake-effect snow events over lake Erie. *Mon. Wea. Rev.* **136**, 2747–2763. <https://doi.org/DOI:10.1175/2007MWR2310.1>.
- Elo, A.-R.: Effects of climate and morphology on temperature conditions of lakes. University of Helsinki, Division of Geophysics, Report series in Geophysics. Available at <http://urn.fi/URN:ISBN:978-952-10-3745-0>, 2007.
- Eerola, K., Rontu, L., Kourzeneva, E. and Shcherbak, E.: A study on effects of lake temperature and ice cover in HIRLAM. *Boreal Env. Res.*, 15, 130–142, 2010.
- Eerola, K.: Twenty-one years of verification from the HIRLAM NWP system. *Wea. Forecasting*, 28, 270–285. <https://doi.org/10.1175/WAF-D-12-00068.1>, 2013.
- Eerola, K., Rontu, L., Kourzeneva, E., Kheyrollah Pour, H. and Duguay, C.: Impact of partly ice-free Lake Ladoga on temperature and cloudiness in an anticyclonic winter situation—a case study using a limited area model. *Tellus A*, 66, 23929, <https://doi.org/10.3402/tellusa.v66.23929>, 2014.
- Gandin, L.: Objective analysis of meteorological fields. Gidrometizdat, Leningrad. Translated from Russian, Jerusalem, Israel Program for Scientific Translations, 1965.
- Kheyrollah Pour, H., Rontu, L., Duguay, C. R., Eerola, K. and Kourzeneva, E.: Impact of satellite-based lake surface observations on the initial state of HIRLAM. Part II: Analysis of lake surface temperature and ice cover. *Tellus A*, 66, 21395, <https://doi.org/10.3402/tellusa.v66.21395>, 2014.
- Kheyrollah Pour, H., Choulga, M., Eerola, K., Kourzeneva, E., Rontu, L., Pan F. and Duguay C. R.: Towards improved objective analysis of lake surface water temperature in a NWP model: preliminary assessment of statistical properties. *Tellus A*, 66, 21534, <https://doi.org/10.1080/16000870.2017.1313025>, 2017.
- Korhonen J.: Suomen vesistöjen jääolot. Suomen ympäristö, (751), 145 pp (in Finnish). Available at <http://hdl.handle.net/10138/40687>, 2005.
- Korhonen J.: Suomen vesistöjen lämpötilaolot 1900-luvulla. Suomen ympäristö, (566), 116 pp (in Finnish). Available at <http://hdl.handle.net/10138/40478>, 2002.
- Kourzeneva, E., Samuelsson, P., Ganbat, G. and Mironov, D.: Implementation of lake model Flake into HIRLAM. *HIRLAM Newsletter*, (54), 54–64. Available at <http://hirlam.org/>, 2008.

*Author contributions.* Laura Rontu computed the LSWT statistics based on HIRLAM feedback files. Kalle Eerola performed the freezing and melting date, snow and ice thickness comparisons based on data picked from HIRLAM grib files. Matti Horttanainen prepared observation data obtained via SYKE open data interface and lake depths from GLDB v.3. Laura Rontu wrote the manuscript text based on input from all authors.

5 *Competing interests.* No competing interests are present.

*Acknowledgements.* Our thanks are due to Joni-Pekka Pietikäinen and Ekaterina Kourzeneva for discussions and information, to Margarita Choulga and Olga Toptunova for the support with the GLDB lake depth data and to Emily Gleeson for advice with English language.



- Kourzeneva, E., Asensio, H., Martin, E. and Faroux, S.: Global gridded dataset of lake coverage and lake depth for use in numerical weather prediction and climate modelling. *Tellus A*, 64,15640. <https://doi.org/10.3402/tellusa.v64i0.15640>, 2012a.
- Kourzeneva, E., Martin, E., Batrak, Y. and Moigne, P. L.: Climate data for parameterisation of lakes in numerical weather prediction models. *Tellus A*, 64, 17226. <https://doi.org/10.3402/tellusa.v64i0.17226>, 2012b.
- 5 Kourzeneva, E.: Assimilation of lake water surface temperature observations with Extended Kalman filter. *Tellus A*, 66, 21510. <https://doi.org/10.3402/tellusa.v66.21510>, 2014.
- Laird, N. F., Kristovich, D. A. R. and Walsh, J. E.: Idealized model simulations examining the mesoscale structure of winter lake-effect circulations. *Mon. Wea. Rev.* **131**, 206–221. [https://doi.org/DOI:10.1175/1520-0493\(2003\)131<0206:IMSETM>2.0.CO;2](https://doi.org/DOI:10.1175/1520-0493(2003)131<0206:IMSETM>2.0.CO;2), 2003.
- Leppäranta, M., Lindgren, E. and Shirasawa, K.: The heat budget of Lake Kilpisjärvi in the Arctic tundra. *Hydrology research*, 48, 969–980. <https://doi.org/10.2166/nh.2016.171>, 2012.
- 10 Lei, R., Leppäranta, M., Cheng, B., Heil P. and Li, Z.: Changes in ice-season characteristics of a European Arctic lake from 1964 to 2008. *Climatic Change*, 115, 725–739. <https://doi.org/10.1007/s10584-012-0489-2>, 2012.
- Lindstedt, D., P. Lind, E. Kjellström and C. Jones.: A new regional climate model operating at the meso-gamma scale: performance over Europe. *Tellus A*, 67, 24138. <https://doi.org/10.3402/tellusa.v67.24138>, 2015.
- 15 Loveland, T. R., Reed, B. C., Brown, J. F., Ohlen, D. O., Zhu, J. and co authors: Development of a global land cover characteristics database and IGBP DISCover from 1-km AVHRR data. *Int. J. Rem. Sens.*, 21, 1303–1130. Data and documentation available online at: <http://edc2.usgs.gov/glcc/glcc.php>, 2000.
- Masson, V., P. Le Moigne, E. Martin, S. Faroux, S. Alias, A. Alkama, R. Belamari, S. Barbu, A. Boone, A. Bouyssel, F. Brousseau, P. Brun, E., Calvet, J.-C., Carrer, D., Decharme, B., Delire, C., Donier, S., Essaouini, K., Gibelin, A.-L., Giordani, H., Habets, F., Jidane, M., Kerdran, G., Kourzeneva, E., Lafaysse, M., Lafont, S., Lebeaupin Brossier, C., Lemonsu, A., Mahfouf, J.-F., Marguinaud, P., Mokhtari, M., Morin, S., Pigeon, G., Salgado, R., Scity, Y., Taillefer, F., Tanguy, G., Tulet, P., Vincendon, B., Vionnet, V., and Voldoire, A.: The SURFEXv7.2 land and ocean surface platform for coupled or offline simulation of earth surface variables and fluxes. *Geosci. Model Dev.*, 6, 929–960. <https://doi.org/10.5194/gmd-6-929-2013>, 2013.
- Mironov, D., Heise, E., Kourzeneva, E., Ritter, B., Schneider, N. and Terzhevik, A.: Implementation of the lake parameterisation scheme FLake into the numerical weather prediction model COSMO. *Boreal Env. Res.*, 15, 218–230, 2010.
- 25 Pietikäinen, J.-P., Markkanen, T., Sieck, K., Jacob, D., Korhonen, J., Räisänen, P., Gao, Y., Abola, J., Korhonen, H., Laaksonen, A., and Kaurola, J.: The regional climate model REMO (v2015) coupled with the 1-D freshwater lake model FLake (v1): Fenno-Scandinavian climate and lakes. *Geosci. Model Dev.*, 11, 1321–1342, <https://doi.org/10.5194/gmd-11-1321-2018>, 2018.
- Rontu, L., Eerola, K., Kourzeneva, E. and Vehviläinen, B.: Data assimilation and parameterisation of lakes in HIRLAM. *Tellus A*, 64, 17611. <https://doi.org/10.3402/tellusa.v64i0.17611>, 2012.
- 30 Rontu L., Gleeson, E., Räisänen, P., Nielsen, K.P., Savijärvi, H. and Sass, B.H.: The HIRLAM fast radiation scheme for mesoscale numerical weather prediction models. *Adv.Sci.Res.*, 14, 195–215, <https://doi.org/10.5194/asr-14-195-2017>, 2017.
- Rooney, G. G. and Bornemann, F. J.: The performance of FLake in the Met Office Unified Model. *Tellus A*, 65, 21363, <https://doi.org/10.3402/tellusa.v65i0.21363>, 2013.
- 35 Samuelsson, P., Kourzeneva, E. and Mironov, D.: The impact of lakes on the European climate as stimulated by a regional climate model. *Boreal Env. Res.*, 15, 113–129, 2010.
- SYKE. ISO 19115 Geographic Information Metadata on Hydrological data. Available at <http://metatieto.ymparisto.fi:8080/geoportal/catalog/search/resource/details.page?uuid=%7B86FC3188-6796-4C79-AC58-8DBC7B568827%7D>, 2018.

## References

- Balsamo, G., R. Salgado, E. Dutra, S. Bousssetta, T. Stockdale and M. Potes: On the contribution of lakes in predicting near-surface temperature in a global weather forecasting model. *Tellus A*, 64, 15829. <https://doi.org/10.3402/tellusa.v64i0.15829>, 2012.
- Bengtsson, L., U. Andrae, T. Aspelién, Y. Batrak, J. Calvo, W. de Rooy, E. Gleeson, B. Hansen-Sass, M. Homleid, M. Hortal, K. Ivarsson, G. Lenderink, S. Niemelä, K. Pagh Nielsen, J. Orville, L. Rontu, P. Samuelsson, D. Santos Muñoz, A. Subias, S. Tijm, V. Toll, X. Yang, and M. Ødegaard Koltzow: The HARMONIE-AROME model configuration in the ALADIN-HIRLAM NWP system. *Monthly Wea. Rev.*, 145, 1919–1935. <https://doi.org/10.1175/MWR-D-16-0417.1>, 2018.
- 5 Cheng, B., Vihma, T., Rontu, L., Kontu A., Kheyrollah Pour, H., Duguay, C. and Pulliainen, J.: Evolution of snow and ice temperature, thickness and energy balance in Lake Orajärvi, northern Finland. *Tellus A: Dynamic Meteorology and Oceanography* ,66, 21564. <https://doi.org/10.3402/tellusa.v66.21564>, 2014.
- 10 Choulga, M., Kourzeneva, E., Zakharova, E. and Doganovsky, A.: Estimation of the mean depth of boreal lakes for use in numerical weather prediction and climate modelling. *Tellus A*, 66, 21295. <https://doi.org/10.3402/tellusa.v66.21295>, 2014.
- Elo, A.-R.: Effects of climate and morphology on temperature conditions of lakes. University of Helsinki, Division of Geophysics, Report series in Geophysics. Available at <http://urn.fi/URN:ISBN:978-952-10-3745-0>, 2007.
- 15 Eerola, K., Rontu, L., Kourzeneva, E. and Shcherbak, E.: A study on effects of lake temperature and ice cover in HIRLAM. *Boreal Env. Res.*, 15, 130–142, 2010.
- Eerola, K.: Twenty-one years of verification from the HIRLAM NWP system. *Wea. Forecasting*, 28, 270–285. <https://doi.org/10.1175/WAF-D-12-00068.1>, 2013.
- Eerola, K., Rontu, L., Kourzeneva, E., Kheyrollah Pour, H. and Duguay, C.: Impact of partly ice-free Lake Ladoga on temperature and cloudiness in an anticyclonic winter situation—a case study using a limited area model. *Tellus A*, 66, 23929. <https://doi.org/10.3402/tellusa.v66.23929>, 2014.
- 20 Gandin, L.: Objective analysis of meteorological fields. *Gidrometizdat, Leningrad*. Translated from Russian, Jerusalem, Israel Program for Scientific Translations, 1965.
- Kheyrollah Pour, H., Rontu, L., Duguay, C. R., Eerola, K. and Kourzeneva, E.: Impact of satellite-based lake surface observations on the initial state of HIRLAM. Part II: Analysis of lake surface temperature and ice cover. *Tellus A*, 66, 21395. <https://doi.org/10.3402/tellusa.v66.21395>, 2014.
- Kheyrollah Pour, H., Choulga, M., Eerola, K., Kourzeneva, E., Rontu, L., Pan F. and Duguay C. R.: Towards improved objective analysis of lake surface water temperature in a NWP model: preliminary assessment of statistical properties. *Tellus A*, 66, 21534. <https://doi.org/10.1080/16000870.2017.1313025>, 2017.
- 30 Korhonen J.: Suomen vesistöjen jäätöot. *Suomen ympäristö, (751)*, 145 pp (in Finnish). Available at <http://hdl.handle.net/10138/40687>, 2005.
- Korhonen J.: Suomen vesistöjen lämpötilaolot 1900-luvulla. *Suomen ympäristö, (566)*, 116 pp (in Finnish). Available at <http://hdl.handle.net/10138/40478>, 2002.
- Kourzeneva, E., Samuelsson, P., Ganbat, G. and Mironov, D.: Implementation of lake model Flake into HIRLAM. *HIRLAM Newsletter*, (54), 54–64. Available at <http://hirlam.org/>, 2008.
- 35 Kourzeneva, E., Asensio, H., Martin, E. and Faroux, S.: Global gridded dataset of lake coverage and lake depth for use in numerical weather prediction and climate modelling. *Tellus A*, 64,15640. <https://doi.org/10.3402/tellusa.v64i0.15640>, 2012a.

- Termonia, P., Fischer, C., Bazile, E., Bouyssel, F., Brožková, R., Bérnard, P., Bochenek, B., Degrauwe, D., Derkova, M., El Khatib, R., Hamdi, R., Mašek, J., Pottier, P., Pristov, N., Seity, Y., Smolíková, P., Spaniel, O., Tudor, M., Wang, Y., Wittmann, C., and Joly, A.: The ALADIN System and its canonical model configurations AROME CY41T1 and ALARO CY40T1, *Geosci. Model Dev.*, 11, 257–281, <https://doi.org/10.5194/gmd-11-257-2018>, 2018.
- 5 Undén, P., Rontu, L., Järvinen, H., Lynch, P., Calvo, J., Cats, G., Cuxart, J., Eerola, K., Fortelius, C., Garcia-Moya, J. A. et al.: HIRLAM-5 scientific documentation. Available at <http://www.hirlam.org>, 2002.
- Yang, Y., Cheng, B., Kourzeneva, E., Semmler, T., Rontu, L., Leppäranta, M., Shirasawa, K. and Li, Z. J.: Modelling experiments on air–snow–ice interactions over Kilpisjärvi, a lake in northern Finland. *Boreal Env. Res.* 18: 341–358, 2013.

- Kourzeneva, E., Martin, E., Batrak, Y. and Moigne, P. L.: Climate data for parameterisation of lakes in numerical weather prediction models. *Tellus A.*, 64, 17226. <https://doi.org/10.3402/tellusa.v64i0.17226>, 2012b.
- Kourzeneva, E.: Assimilation of lake water surface temperature observations with Extended Kalman filter. *Tellus A.*, 66, 21510. <https://doi.org/10.3402/tellusa.v66.21510>, 2014.
- 5 Leppäranta, M., Lindgren, E. and Shirasawa, K.: The heat budget of Lake Kilpisjärvi in the Arctic tundra. *Hydrology research*, 48, 969–980. <https://doi.org/10.2166/nh.2016.171>, 2012.
- Lei, R., Leppäranta, M., Cheng, B., Heil P. and Li, Z.: Changes in ice-season characteristics of a European Arctic lake from 1964 to 2008. *Climatic Change*, 115, 725–739. <https://doi.org/10.1007/s10584-012-0489-2>, 2012.
- Lindstedt, D., P. Lind, E. Kjellström and C. Jones: A new regional climate model operating at the meso-gamma scale: performance over Europe. *Tellus A.*, 67, 24138. <https://doi.org/10.3402/tellusa.v67.24138>, 2015.
- 10 Loveland, T. R., Reed, B. C., Brown, J. F., Ohlen, D. O., Zhu, J. and co authors: Development of a global land cover characteristics database and IGBP DISCover from 1-km AVHRR data. *Int. J. Rem. Sens.*, 21, 1303–1330. Data and documentation available online at: <http://edc2.usgs.gov/glcc/glcc.php>, 2000.
- Masson, V., P. Le Moigne, E. Martin, S. Faroux, S., and coauthors: The SURFEXv7.2 land and ocean surface platform for coupled or offline simulation of earth surface variables and fluxes, *Geosci. Model Dev.*, 6, 929–960. <https://doi.org/10.5194/gmd-6-929-2013>, 2013.
- 15 Mironov, D., Heise, E., Kourzeneva, E., Ritter, B., Schneider, N. and Terzhevik, A.: Implementation of the lake parameterisation scheme FLake into the numerical weather prediction model COSMO. *Boreal Env. Res.*, 15, 218–230, 2010.
- Pietikäinen, J.-P., Markkanen, T., Sieck, K., Jacob, D., Korhonen, J., Räisänen, P., Gao, Y., Ahola, J., Korhonen, H., Laaksonen, A., and Kaurola, J.: The regional climate model REMO (v2015) coupled with the 1-D freshwater lake model FLake (v1): Fennoscandinavian climate and lakes, *Geosci. Model Dev.*, 11, 1321–1342, <https://doi.org/10.5194/gmd-11-1321-2018>, 2018.
- 20 Rontu, L., Eerola, K., Kourzeneva, E. and Vehviläinen, B.: Data assimilation and parametrisation of lakes in HIRLAM. *Tellus A.*, 64, 17611. <https://doi.org/10.3402/tellusa.v64i0.17611>, 2012.
- Rontu L., Gleeson, E., Räisänen, P., Nielsen, K.P., Savijärvi, H. and Sass, B.H.: The HIRLAM fast radiation scheme for mesoscale numerical weather prediction models. *Adv.Sci.Res.*, 14, 195–215, <https://doi.org/10.5194/asr-14-195-2017>, 2017.
- 25 Rooney, G. G. and Bornemann, F. J.: The performance of FLake in the Met Office Unified Model. *Tellus A.*, 65, 21363. <https://doi.org/10.3402/tellusa.v65i0.21363>, 2013.
- Samuelsson, P., Kourzeneva, E. and Mironov, D.: The impact of lakes on the European climate as stimulated by a regional climate model. *Boreal Env. Res.*, 15, 113–129, 2010.
- 30 SYKE. ISO 19115 Geographic Information Metadata on Hydrological data. Available at <http://metatieto.ymparisto.fi:8080/geoportal/catalog/search/resource/details.page?uuid=%7B86FC3188-6796-4C79-AC58-8DBC7B568827%7D>, 2018.
- Undén, P., Rontu, L., Järvinen, H., Lynch, P., Calvo, J., Cats, G., Cuxart, J., Eerola, K., Fortelius, C., Garcia-Moya, J. A. et al.: HIRLAM-5 scientific documentation. Available at <http://www.hirlam.org>, 2002.
- Yang Y., Cheng B., Kourzeneva E., Semmler T., Rontu L. and coauthors: 2013. Modelling experiments on air–snow–ice interactions over Kilpisjärvi, a lake in northern Finland. *Boreal Environ. Res.*, 18, 341–358.
